# Massively parallel CRISPRi assays reveal concealed thermodynamic determinants of dCas12a binding

David A. Specht,<sup>1</sup> Yasu Xu,<sup>2</sup> and Guillaume Lambert<sup>1,\*</sup>

<sup>1</sup>*School of Applied and Engineering Physics, Cornell University, Ithaca, NY 14853, USA*

<sup>2</sup>*Field of Biophysics, Cornell University, Ithaca, NY 14853, USA*

The versatility of CRISPR-Cas endonucleases as a tool for biomedical research has led to diverse applications in gene editing, programmable transcriptional control, and nucleic acid detection. Most CRISPR-Cas systems, however, suffer from off-target effects and unpredictable non-specific binding that negatively impact their reliability and broader applicability. To better evaluate the impact of mismatches on DNA target recognition and binding, we develop a massively parallel CRISPR interference (CRISPRi) assay to measure the binding energy between tens of thousands of CRISPR RNA (crRNA) and target DNA sequences. By developing a general thermodynamic model of CRISPR-Cas binding dynamics, our results unravel a comprehensive map of the energetic landscape of *Francisella novicida* Cas12a (FnCas12a) as it searches for its DNA target. Our results reveal concealed thermodynamic factors affecting FnCas12a DNA binding which should guide the design and optimization of crRNA that limit off-target effects, including the crucial role of an extended PAM sequence and the impact of the specific base composition of crRNA-DNA mismatches. Our generalizable approach should also provide a mechanistic understanding of target recognition and DNA binding when applied to other CRISPR-Cas systems.

## INTRODUCTION

Clustered regularly interspaced short palindromic repeats (CRISPR) and its associated genes are part of an adaptive immunity system used to combat phage infections in bacteria and archaea [1]. The system consists of two main components: a CRISPR array, which contains repetitive sequences called repeats and variable sequences called spacers, and CRISPR-associated (Cas) genes, which facilitate spacer acquisition and the destruction of foreign DNA and RNA. Mature CRISPR RNAs (crRNAs) derived from the CRISPR array can in turn program Cas nucleases to recognize and cleave DNA targets whose nucleic acid sequence is complementary with the guide portion of the crRNA and proximal to a PAM (protospacer adjacent motif) site. Due to their simple and programmable nature, the nucleases of class 2 CRISPR systems, particularly Cas9 (type II) and Cas12 (type V), have been the subject of intense research interest for the purposes of genome editing [2–4], programmable gene regulation utilizing a catalytically-dead CRISPR nuclease (dCas) [5–7], and nucleic acid detection [8, 9].

While CRISPR has already revolutionized many areas of research, from fundamental biomedical sciences to synthetic biology to disease diagnostics, a fundamental understanding of the underlying factors affecting CRISPR-Cas off-target *binding* is still lacking. This is especially important in the context of CRISPR base editors [10, 11] because off-target binding, which may not entirely correlate with DNA cleavage [12–14], needs to be reduced to a minimum level

to prevent unintended base changes. While several *in silico* models [15–20] have been developed to predict the binding affinity of RNA guided CRISPR-Cas proteins using data from *in vitro* biochemical assays [21–24] or *in vivo* indel frequencies [12–14, 25–27], these approaches only provide empirical interpretations of CRISPR-Cas DNA binding and often fail to yield a conceptual understanding of the underlying factors involved in CRISPR-Cas binding. Furthermore, it can be difficult to extract quantitative binding affinity measurements from *in vivo* indel frequencies due to the inherent CRISPR-Cas binding inefficiencies associated with cellular physiological factors such as cell type, chromatin state, and delivery method [28–30]. Thus, there is a critical need for fundamental models that can help unravel the sequence-dependent determinants of CRISPR-Cas target recognition and DNA binding affinity.

To elucidate determinants of CRISPR-Cas12 off-target binding, we combine a thermodynamic model of dCas12a binding with a rationally designed CRISPRi assays to map the binding energy landscape of a type V CRISPR-Cas system from *Francisella novicida* (FnCas12a) as it inspects and binds to its DNA targets. Our approach, inspired by a recent theoretical framework that employs a unified energetic analysis to predict *S. pyogenes* Cas9 (SpCas9) cleavage activity [31] and recently developed massively parallel multiplexed assays [32–35], aims to directly measure the energetic and thermodynamic determinants of CRISPR-Cas *binding*. In other words, our assays excludes sources of variation in DNA cleavage activity caused by unknown physiological factors [28–30] by only focusing on the steps *leading* to final DNA cleavage step. Furthermore, our predictive framework is not limited to FnCas12a and can be applied to any other CRISPR-Cas systems, which should in turn fa-

\* Corresponding author

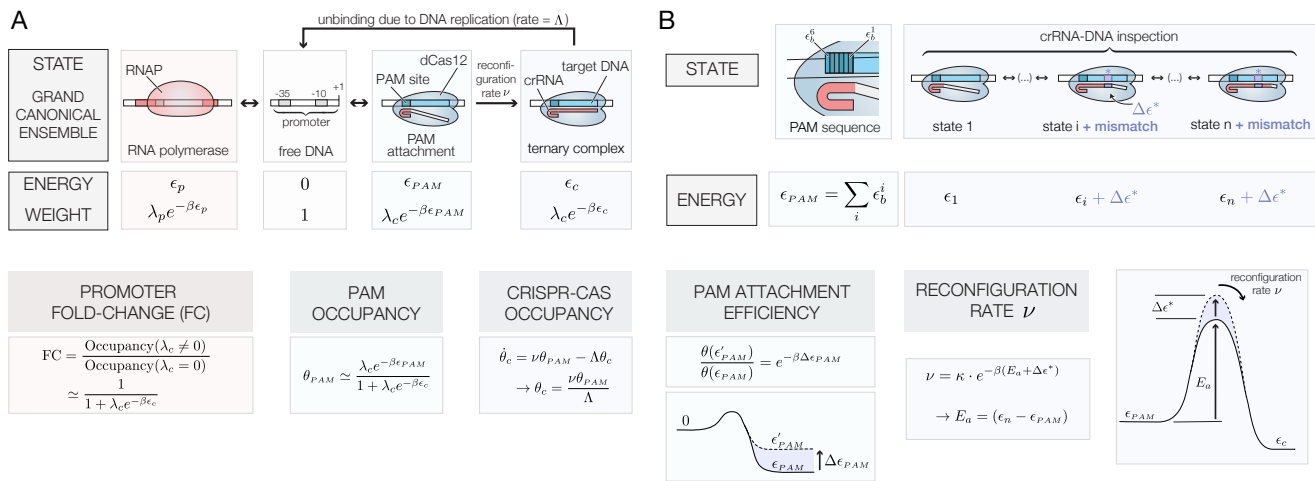

FIG. 1. Thermodynamic model used to describe a nuclease-dead Cas12 endonuclease’s “PAM attachment,” “crRNA-DNA inspection,” and “reconfiguration” steps. A) Energy states, energies and Boltzmann weights of a dCas12a ( $\beta = k_B T$ ). The fold-change, PAM occupancy and CRISPR-Cas occupancy depends on the effective PAM energy  $\epsilon_{PAM}$  and CRISPR-Cas binding energy  $\epsilon_c$ . All expressions assume the weak promoter ( $\lambda_p e^{-\beta \epsilon_p} \ll 1$ ) and weak PAM binding ( $\lambda_c e^{-\beta \epsilon_{PAM}} \ll 1$ ) limits. B) Internal base-dependent states define a PAM specific binding energy. The specific PAM sequence dictates the relative PAM attachment efficiency between two targets. The presence of crRNA-target DNA mismatches increase the effective activation energy  $E_a$  and affect the effective reconfiguration rate  $\nu$ .

89 cilitate the development of predictive models of target  
 90 recognition and binding efficiency for type II and type  
 91 V RNA-guided CRISPR-Cas proteins.

## 92 RESULTS

### 93 Thermodynamic model of dCas binding

94 DNA cleavage by CRISPR-Cas endonucleases may  
 95 be hindered by other factors [28–30] besides the spe-  
 96 cific crRNA-DNA sequence, and it is important to dis-  
 97 entangle these effects to gain a deep understand-  
 98 ing of off-target binding mechanisms. We thus hy-  
 99 pothesize that the variability in indel formation ob-  
 100 served in live cells may not entirely originate from  
 101 differences in Cas12a’s cleavage activity caused by  
 102 the specific crRNA-DNA sequence targeted, but also  
 103 from sequence-dependent PAM attachment efficien-  
 104 cies and the existence of crRNA-target DNA mis-  
 105 matches by asking whether the steps *leading* to a  
 106 ternary complex formation play a role in CRISPR-Cas  
 107 off-target binding affinity.

108 To formalize this approach and to obtain a fun-  
 109 damental understanding of the energetic landscape  
 110 of dCas12a as it inspects and associates with its  
 111 DNA target, we developed a general thermodynamic  
 112 model of CRISPR-Cas binding dynamics to determine  
 113 how crRNA-DNA mismatches affect FnCas12a tar-  
 114 get recognition and binding. This model (see supple-  
 115 mentary information and Fig. 1) is based on recent  
 116 structural biology and single-molecule studies [36, 37]

117 which revealed that DNA hydrolysis by Cas12a occurs  
 118 in three discrete stages: “PAM attachment,” where Fn-  
 119 Cas12a latches onto a PAM site, “crRNA-DNA inspec-  
 120 tion,” where FnCas12a forms a partial crRNA-DNA hy-  
 121 brid, and “reconfiguration,” where the protein forms a  
 122 ternary complex and undergoes a conformational change  
 123 that exposes its catalytic residues. While the final DNA  
 124 cleaving step occurs after approximately 1 minute un-  
 125 der the conditions tested in [36], Cas12 molecules with  
 126 inactivated nuclease sites remain stably bound to their  
 127 DNA target for more than 500s. Hence, the reconfigu-  
 128 ration step effectively has no detectable *off-rate*, sug-  
 129 gesting that DNA cleavage may be inevitable (given  
 130 enough time) once Cas12a has reached this stably-  
 131 bound ternary state. The same stability has also been  
 132 observed in single-molecule Cas9 experiments [35].

133 Hence, our thermodynamic model describes the  
 134 probability that FnCas12a loaded with a crRNA se-  
 135 quence will bind to a free, unobstructed target DNA  
 136 sequence using the grand canonical ensemble [38–  
 137 40] to derive an expression for  $\theta_c$ , the FnCas12a oc-  
 138 cupancy, which is defined as the fraction of time a DNA  
 139 target will be occupied by nuclease-dead FnCas12a  
 140 endonuclease. This occupancy is given by

$$141 \theta_c = \nu \frac{\theta_{PAM}}{\Lambda} \quad (1)$$

142 where  $\theta_{PAM}$  is the PAM occupancy (the attachment  
 143 probability) and  $\nu$  is the probability that FnCas12a will  
 144 form a stable ternary complex once it encounters a  
 145 PAM site (the reconfiguration rate). Since DNA repli-  
 cation forks appear to be the only processes that can

146 kick nuclease-dead SpCas9 off of its DNA binding site  
147 [41], we assume dCas12a unbinding occurs through a  
148 similar process—i.e. DNA duplication machinery kicks-  
149 off FnCas12a at a rate equal to  $\Lambda$  (the cell's duplication  
150 rate).

We next use this approach to compare occupancies of targets that vary by a few base determinants (Fig. 1B). In this framework, the propensity of a given crRNA to target to bind to an off-target DNA region compared with its intended target is simply given by the different energetic contributions of that specific off-target location. For instance, two identical DNA targets that possess different PAM sequences have effective binding energies that differ by  $\Delta\epsilon_{PAM}$ , which in turn translates in a reduction of the attachment probability by a factor equal to  $e^{-\beta\Delta\epsilon_{PAM}}$  (the Boltzmann factor). Similarly, the presence of mismatches may alter the crRNA-DNA duplex energy by  $\Delta\epsilon^*$ , which in turn also yields a  $e^{-\beta\Delta\epsilon^*}$  change in relative binding probabilities. Hence, the *relative* binding affinity between two targets that have different PAM sites, or between an intended target and an off-target candidate, is simply given by the binding sites' Boltzmann weight

$$\text{Relative binding affinity} = \underbrace{e^{-\beta\Delta\epsilon_{PAM}}}_{\text{PAM}} \underbrace{e^{-\beta\Delta\epsilon^*}}_{\text{Mismatches}}. \quad (2)$$

151 Our framework shares similarities with the  
152 uCRISPR model recently developed by Zhang *et al.*  
153 to describe SpCas9 cleavage activity [31]. How-  
154 ever, instead of testing our model using *in vivo* indel  
155 measurements performed in human cells (which can  
156 be imprecise due to cellular physiological factors [28–  
157 30]), we use a massively parallel CRISPRi assay to  
158 directly measure the sequence-specific PAM binding  
159 energies and the energetic costs associated with  
160 crRNA-DNA mismatches in *E. coli* bacteria.

### 161 Context dependence of FnCas12a CRISPR interference

162 In order to test our thermodynamic model and fur-  
163 ther explore FnCas12a target binding in *E. coli*, we de-  
164 veloped a highly compact, 175bp-long genetic inverter  
165 inserted into a low-copy number plasmid (pSC101)  
166 containing a catalytically-dead nuclease FnCas12a  
167 (Fig. 2A, inset). The inverter element consists of a  
168 constitutive promoter driving the expression of a cr-  
169 RNA followed by two rho-independent terminators. Lo-  
170 cated immediately downstream of two terminators is  
171 the output promoter, which either contains a built-in  
172 PAM site within the promoter or after the promoter's  
173 +1 location.

174 We first sought to investigate effectiveness of  
175 Cas12a-mediated CRISPRi by measuring protein and  
176 mRNA levels of a simple inverter driving sfGFP ex-  
177 pression. The inverter constitutively expresses a cr-  
178 RNA targeting a DNA binding region located at the

179 promoter's -19 position. Fluorescence levels for con-  
180 structs containing a crRNA were 24.3 times lower than  
181 those without a crRNA (Fig. 2B) and mRNA transcript  
182 levels measured using digital droplet PCR resulted in  
183 a 123-fold reduction in mRNA transcript levels when a  
184 crRNA is expressed (Fig. 2C). Both of these results  
185 confirm that FnCas12a can repress RNA transcription  
186 [7].

187 Next, we tested how dCas12a interferes with RNA  
188 transcription under various configurations (Figs. 2D-  
189 E) by placing a library of up to several thousands sim-  
190 ple inverter constructs in front of a tetA-sacB cassette.  
191 Since sacB is counterselectable genetic markers in the  
192 presence of sucrose [44] (see Fig. S2), the genetic  
193 inverters that efficiently repress RNA transcription will  
194 be enriched in the population when grown under su-  
195 crose conditions (SK). Thus, we can evaluate the abil-  
196 ity of a RNA-guided FnCas12a to prevent transcription  
197 by comparing the number of times each construct is  
198 present in the whole population for control (K) and SK  
199 conditions using the MiSeq or iSeq100 platform from  
200 Illumina. The relative change in the population frac-  
201 tion is then used to find the effective growth rate  $\Lambda$   
202 of every construct in each condition. While selection  
203 experiments are also performed under tetracycline-  
204 selective (TK) media, the counterselection experiment  
205 (SK) yields more useful information because the bind-  
206 ing affinity and the dCas12 promoter occupancy is di-  
207 rectly related to each construct's growth rate (see sup-  
208 plementary materials for a complete description of this  
209 method).

210 Fig. 2D (top) and S3 shows that CRISPRi occurs  
211 efficiently when the FnCas12a target is located after  
212 the output promoter's +1 transcription initiation site be-  
213 cause the growth rate under SK conditions is close  
214 to its maximum value ( $\Lambda_0$ ) regardless of the location  
215 of the DNA binding site. Interestingly, while inter-  
216 ference measurements performed using SpCas9 (a type  
217 II CRISPR-Cas nuclease) revealed that a second bind-  
218 ing site results in suppressive combinatorial effects  
219 that multiplicatively increases CRISPRi efficiency [5],  
220 the existence of a second PAM+target DNA sequence  
221 does not improve dCas12 CRISPRi efficiency beyond  
222 what is achieved by a single target (Figs. 2D, bottom  
223 and S3).

224 Next, we tested FnCas12's ability to interfere  
225 with RNA transcription initiation by introducing a  
226 PAM+target DNA sequence within the promoter se-  
227 quence. In particular, we tested several inverter con-  
228 structs whose PAM+target DNA sequence was lo-  
229 cated at different positions within the promoter's -35  
230 and -1 location, testing both the coding and template  
231 strands without altering conserved promoter regions  
232 (Fig. 2E). Our results show that CRISPR inter-  
233 ference through promoter occlusion is efficient for most  
234 targets on both the coding and template strands, al-  
235 though the effective repression rate is more variable  
236 than what has been reported for CRISPR-Cas9 in-

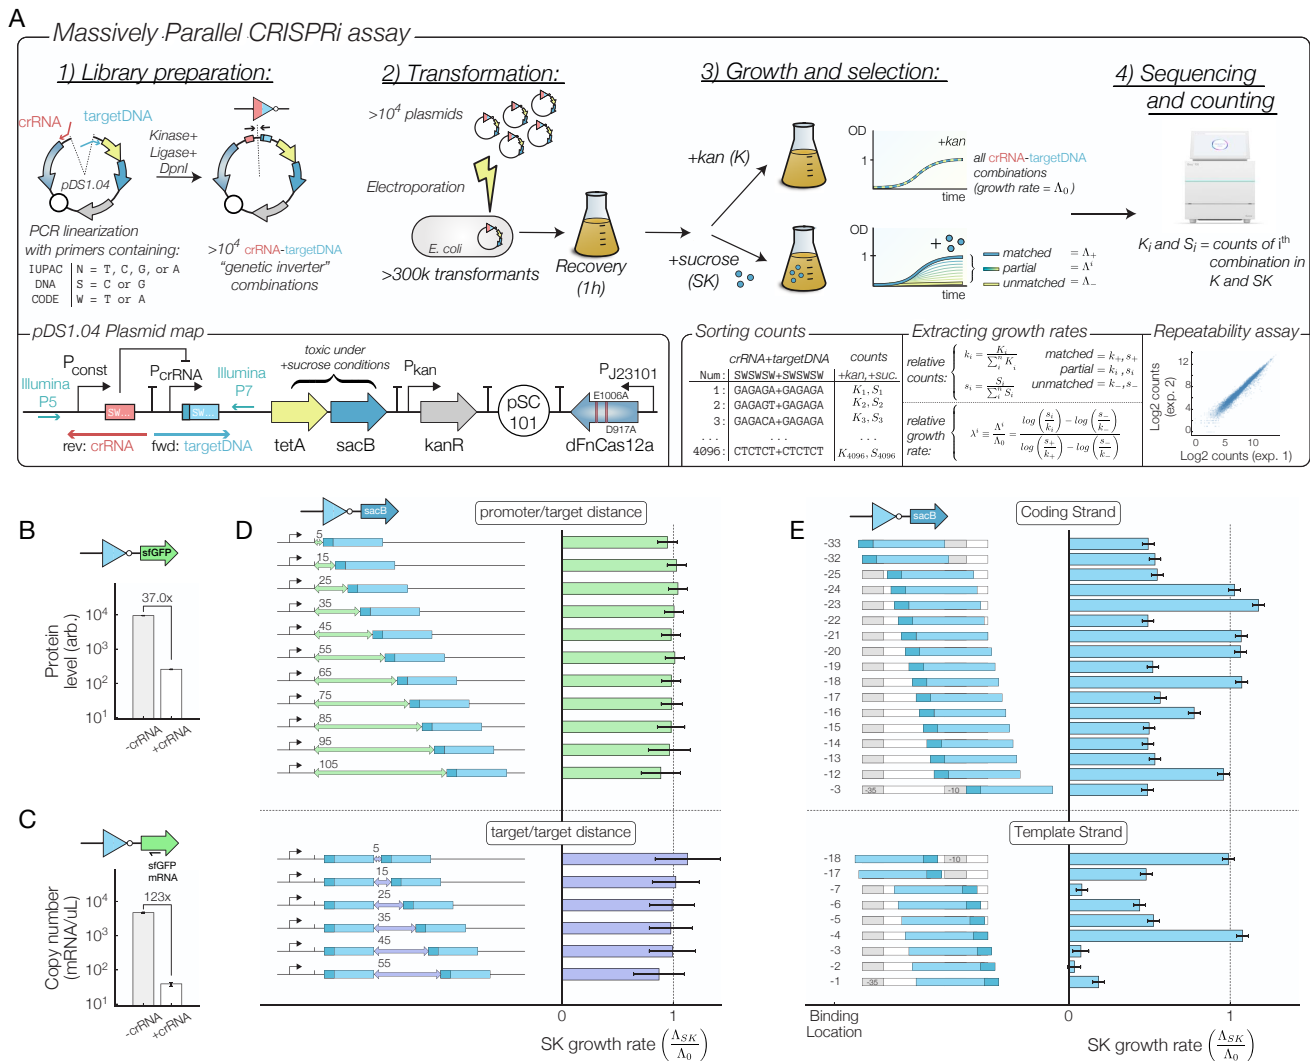

FIG. 2. A) Experimental workflow. More than  $10^4$  different crRNA-target DNA combinations are assembled in parallel using PCR primers containing degenerate IUPAC DNA codes (e.g. S, W, N). The ability of each construct to repress a tetA-sacB cassette is measured by comparing growth rates under control (K) and sucrose (SK) conditions. While the library construction is prone to some biases during the amplification and sequencing steps, a high level of repeatability is observed between experiments that started with the same assembled library (lower right). B) Protein and C) RNA level fold-change for a genetic inverter driving sfGFP expression. D) Growth rate under sucrose conditions when one or two DNA targets are located after the +1 promoter location and when E) the DNA target overlaps with the -35 and -10 regions of promoter.  $\Lambda_0$  = growth rate under control (K) conditions. Error bars are calculated using a LOESS fit [42, 43] of the mean/variance relationship between experimental replicates of the fold change.

237 interference [6]. Growth under SK conditions is also  
 238 lowest when the target DNA is located on the pro-  
 239 moter's template strand at locations -1, -2, -3, and -  
 240 7 with respect to the transcription initiation site, which  
 241 suggests that RNA:DNA hybrids on the non-template  
 242 strand display a decreased effectiveness in preventing  
 243 RNA transcription initiation.

### 244 FnCas12a binding energies depend on an extended 245 PAM sequence

246 Having demonstrated the validity of our massively  
 247 parallel CRISPRi assay to test multiple genetic inverter  
 248 combinations, we next investigated the impact of a  
 249 PAM sequence on the binding affinity of dCas12. We  
 250 first tested the sequence determinant of the PAM at-  
 251 tachment step using an oligo pool containing a de-  
 252 generate 5'-NNNNNN-3' motif for a target DNA se-  
 253 quence located at the promoter's -19 position (Fig.



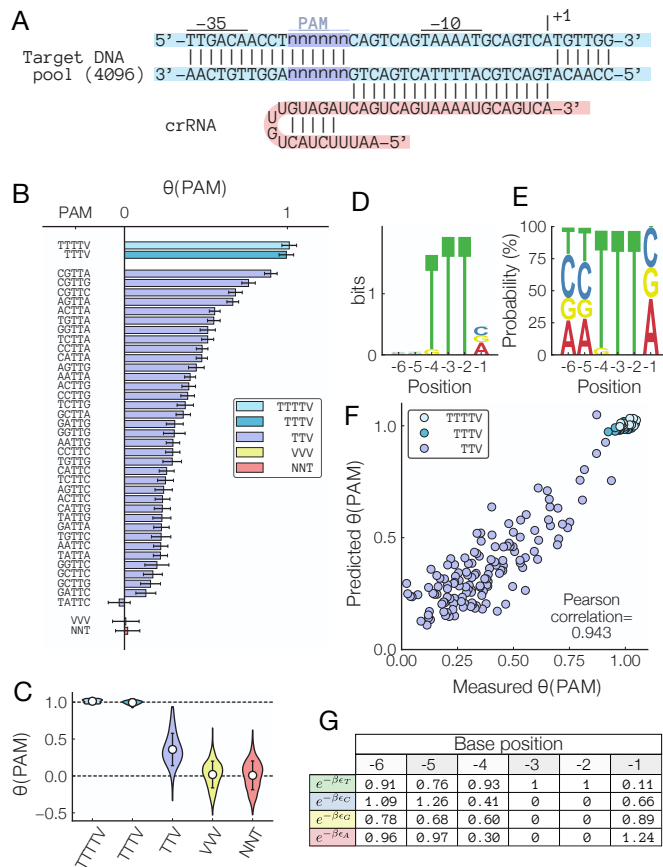

FIG. 3. A) Sequence of the PAM site occupancy library. B) Measured PAM occupancies for all 6-base PAM sites. Error bars = aggregated LOESS fit of the mean/variance relationship between experimental replicates of the fold change. C) Aggregated PAM site occupancies. Error bars = std. dev. D) Bit content and E) probability density of the SK selected PAM site libraries. F) Predicted  $\theta(PAM)$  using the base-dependent binding energy expression  $\epsilon_{PAM} = \sum_i \epsilon_b^i$  G) Fitted values for each position- and base-dependent binding energies.

Our results agree with recent work [45] which demonstrated that FnCas12a does exhibit activity in mammalian cells, but only when used with a TTTV PAM site. It is important to note that while Zetsche *et al.* [3] showed that a TTV PAM site appears to be sufficient to induce FnCas12a cleavage, it appears to be the *least efficient* motif that permits DNA binding (which could explain why FnCas12a was found to be ineffectual for mammalian cell editing using a TTV PAM site). Hence, our results suggest that PAM sites with an extended TTTV sequence should be prioritized when seeking potential FnCas12a DNA targets for CRISPRi, gene editing, nucleic-acid detection, or other applications.

Expanding on this result, we next used the measured attachment efficiencies to develop a predictive model that takes into account the full 6-base PAM site context to predict the attachment efficiency. Specifically, a natural prediction that emerges from our thermodynamics model is that the effective PAM site attachment energy is *additive*, meaning that the PAM binding energy  $\epsilon_{PAM}$  of an arbitrary sequence is given by  $\epsilon_{PAM} = \sum_b \epsilon_b^i$ , where  $\epsilon_b^i$  is the specific binding energy of a base of type  $b=(T,C,G,A)$  at location  $i=(1..6)$ . In this case the relative PAM binding energy between two targets ( $\Delta\epsilon_{PAM} = \epsilon'_{PAM} - \epsilon_{PAM}$ ) is related to the relative growth rate  $\lambda(PAM)$  under SK condition according to  $\lambda(PAM')/\lambda(PAM) = e^{-\Delta\epsilon_{PAM}}$ .

We developed a predictive model of PAM attachment efficiency by first using an initial set of values for each  $\epsilon_b^i$  extracted from the PAM specific growth rates and optimizing the model for 1,000 additional steps to minimize the measured-predicted mean square error (see supplementary methods for details). Our model is able to accurately describe the variability in PAM attachment efficiencies observed in Fig. 3B, and its predictions for the relative PAM site occupancies  $\theta_{PAM}$  agree very well with the measured attachment efficiencies (Fig. 3F, Pearson correlation = 0.943). These results suggest that PAM attachment is well described by our thermodynamic model, and the optimized energetic contribution  $\epsilon_b^i$  of each base  $b$  located at position  $i$  is shown in Fig. 3G. Hence, to ensure that the DNA target with the most efficient PAM site is selected when designing and optimizing a crRNA sequence for DNA binding or other gene editing application, the relative performance of each PAM sequence should be evaluated on a sequence-specific manner using the base-dependent binding energies provided in Fig. 3G.

### Off-target FnCas12a binding depends additively on mismatch energy

To better understand the impact of crRNA-DNA mismatches on dCas12 binding, we next examined how a mismatch affects the effective activation energy (Fig. 1B) that is required for FnCas12a to form a stable

3A) targeted by a single crRNA (target DNA sequence=CAGTCAGTAAAATGCAGTCA). Since previous work has shown that the PAM motif required for FnCas12a DNA cleavage is TTV [3], we nevertheless tested all sequences containing up to six bases of upstream context using 4,096 PAM site variants in a single experiment. These extra bases turn out to be very important: Fig. 3B shows that while TTV is a suitable PAM site, its attachment efficiency is lower than an extended TTTV PAM site (Fig. 3B). In both individual and aggregate measurements, we observe that DNA binding to a DNA target proximal to a TTTV PAM site is 2.8 times more efficient than a TTV PAM site (Fig. 3C). This result is also confirmed by the bias towards TTTV PAM sites in the information content (Fig 3D) and the base-specific probability density in SK conditions (Fig. 3E).

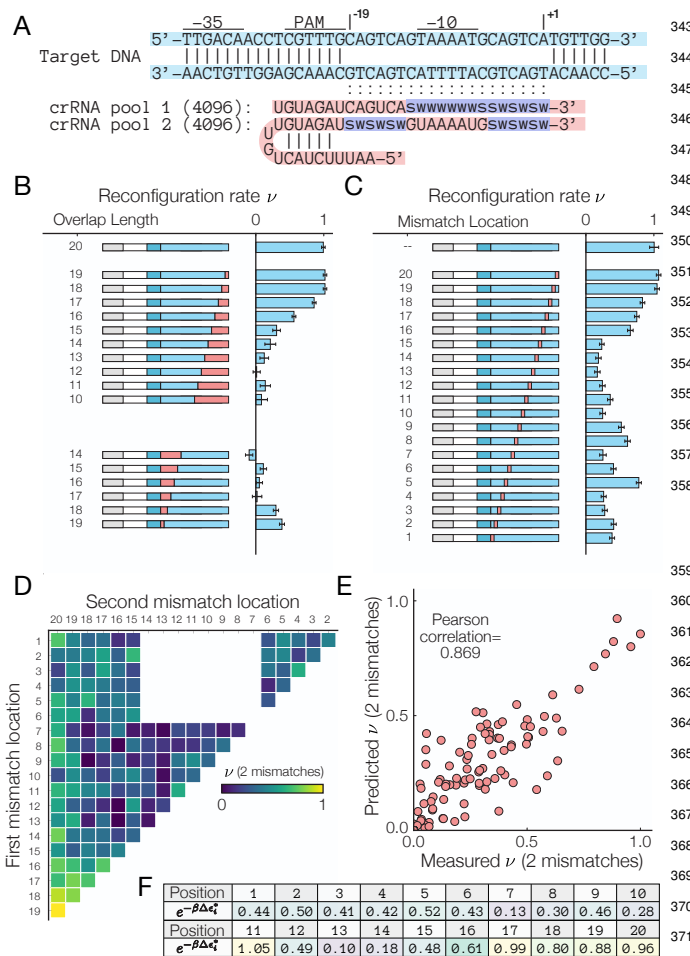

FIG. 4. A) Sequence of the single target mismatch libraries. Reconfiguration rates for B) truncated and gapped crRNAs and for C) single mismatch crRNAs. Error bars = LOESS fit of the mean/variance relationship between experimental replicates of the fold change. D) Experimental and E) predicted reconfiguration rates for crRNA with 2 mismatches. F) Fitted values for the location-dependent binding energies for single mismatches.

ate DNA codes in the primer sequence (e.g. W = A or T, S = G or C), allowing us to test multiple mismatch combinations in a single experiment. Using the degenerate DNA codes S and W ensures that all crRNA sequences maintained the same GC content. In Fig. 4B, we tested the impact of “truncated” (i.e. a crRNA whose distal sequence is noncomplementary to its target DNA) and “gapped” (i.e. a crRNA whose seed sequence is noncomplementary to its target DNA) crRNAs. Consistent with other work performed in Cas12a [26, 27], our results show that optimal reconfiguration rates occur for truncated crRNAs that possess more than 15 bases of homology. Furthermore, no significant binding was detected for gapped crRNAs whose sequences that contain more than 2 mismatches.

Next, we measured the reconfiguration rate for crRNA containing a single mismatch (Fig. 4C). The presence of a single mismatch can decrease the configuration rate by up to 82% when the mismatch occurs in the first 17 bases of the crRNA. Consistent with prior observations by Kim *et al.* [19], the energy cost of a single mismatch does not increase monotonically with distance from the PAM site, suggesting that other contextual determinants besides position affects the reconfiguration rate  $\nu$ . Furthermore, the presence of mismatches located in the last 3 bases of the crRNA does not impede DNA binding, confirming other works performed using *in vivo* indel measurements [26, 27] which demonstrated that crRNA-DNA mismatches negatively impact FnCas12a binding, but only in the seed and the beginning of the trunk region.

Next, we analyzed how the presence of two mismatches impacts the reconfiguration rate. Since in our model the energetic contributions  $\Delta\epsilon_i^*$  of single mismatches at location  $i$  are additive, we anticipated that the 2 mismatch reconfiguration rate is related to the single mismatch energies according to  $\epsilon_{2MM} = \sum_i \Delta\epsilon_i^*$ . To test this, we developed a predictive model that uses the single-base mismatch energies to predict  $\nu_{2MM}$ . Fig. 4D shows the experimentally measured, location-dependent reconfiguration rate  $\nu_{2MM}$ . Using an approach similar to the one used to predict PAM attachment efficiencies, we derived baseline values for the location-dependent binding energy. While the initial Pearson correlation between the predicted and baseline energy values was initially fairly low (P=0.769), the predicted values for the two mismatch reconfiguration rate  $\nu_{2MM}$  agree very well with the measured rates after the 1,000 optimization steps (P=0.869, Fig. 4E). Our results confirm that the energetic impacts of individual mismatches are additive, and location-dependent binding energy costs reported in Fig. 4F should be incorporated to models that aim to predict off-target binding.

ternary complex. Indeed, even though a PAM site is present and dCas12 attaches itself to DNA, the additional energy associated with a crRNA-DNA mismatch can prevent DNA unzipping if insufficient homology is found. According to our model, the reconfiguration step occurs at a rate  $\nu = e^{-\beta \sum_i \Delta\epsilon_i^*}$ , where  $\Delta\epsilon_i^*$  is the base-dependent energy cost associated with a single mismatch at location  $i$ . Thus, the location-specific energy costs associated with individual mismatches should in theory be directly obtained by measuring the reconfiguration rate  $\nu$  of crRNA-DNA sequences that possess the same PAM sequence but with a crRNA that differs from the target DNA by one or more bases.

To test this, we used two different crRNA pools (Fig. 4A) to the mismatch-dependent reconfiguration rate  $\nu$ . Each oligo pool consists of 4,096 different primer sequences generated by specifying degener-

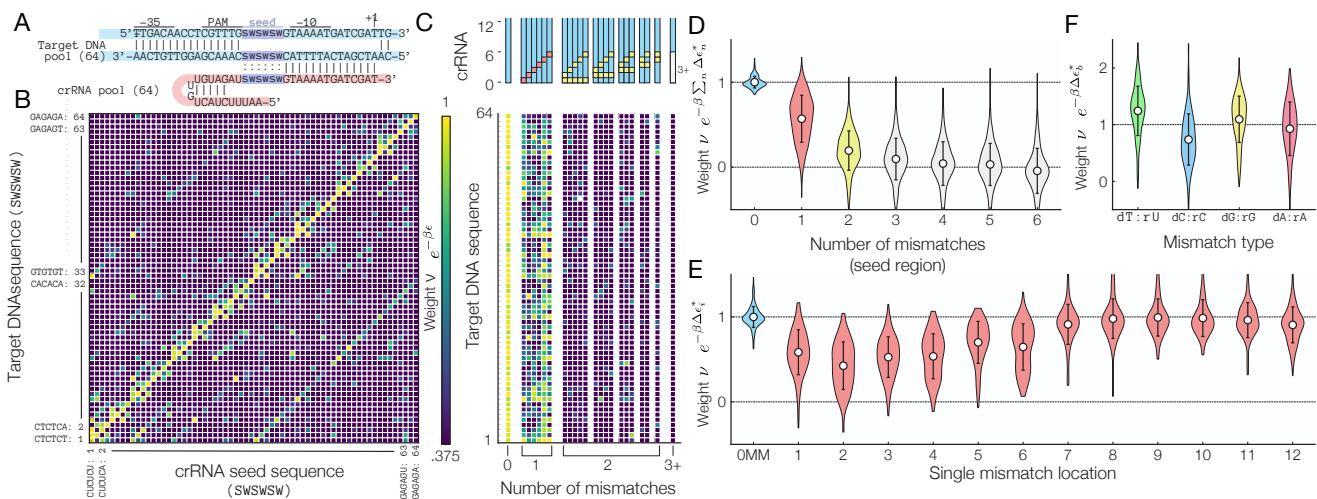

FIG. 5. A) Sequence of the multiplexed mismatch assays for Cas12's seed region. B) Cross-talk map of the reconfiguration rate for (SWSWSW) $\times$ (SWSWSW) data subset (full dataset is shown in Fig. S4). Note that the off-diagonal elements represent crRNA-DNA target that differ by a single mismatch. C) Target DNA dependent reconfiguration rate for SWSWSW sequences containing 0, 1, 2, or 3+ mismatches. D) Aggregated  $\nu$  for crRNA-target DNA combinations containing between 1 to 6 mismatches. E) Aggregated  $\nu$  for crRNA-target DNA combinations containing a single mismatches. F) The reconfiguration rate  $\nu$  for base-specific mismatches. Note that dT:rU and dG:rG mismatches are tolerated at a higher level than dC:rC and dA:rA mismatches. Error bars = std.dev.

### High throughput cross-talk assays reveal position- and nucleotide-specific energy costs

We next asked how both crRNA and DNA variations in the first six bases of the PAM-proximal seed region affected the reconfiguration rate  $\nu$ . We performed multiplexed CRISPRi assays using two oligo pools, each containing 128 different sequences, to test the pairing between all possible crRNA-DNA sequences of the form SWSWSW or WSWSWS in a single step. Once again, those pairings were chosen to maintain all crRNA-DNA sequences at a fixed GC content. This approach covers a large combinatorial space between the spacer-target sequences and produces a comprehensive cross-talk map between 16,384 possible crRNA-DNA combinations (Fig. 5A). While we also performed the same analysis on the crRNA-DNA "trunk" region (Fig. S6), only the SW quadrant of the seed region is shown in Fig. 5B (see Figs. S4-S6 for the full cross-talk maps).

The cross-talk maps show that fully matching crRNA-DNA sequences (i.e. those along the main diagonal of Fig. 5B and in the first column in Fig. 5C) have the highest  $\nu$ . Interestingly, the reconfiguration rate  $\nu$  for all fully-matched crRNA-DNA targets fall within a very narrow range of  $1.00 \pm 0.06$  (mean  $\pm$  std.dev.), suggesting that the specific base composition of the seed region does not have a large impact on DNA binding. This contrasts with *in vivo* multiplexed DNA cleavage assays for Cas12a variants that *do* show significant sequence dependence on cleavage activity [15, 19, 20]. In addition, while Sp-Cas9 binding and cleavage activity has different se-

quence specificities [12–14], we do not observe significant discrepancies between the binding and cleavage assays performed using catalytically-active Fn-Cas12a nuclease (Fig. S7). Hence, we believe our approach may provide a more accurate representation of dCas12a's binding energy landscape because our approach excludes any source of variation caused by unknown cellular physiological factor by only investigating a small but comprehensive portion of all possible crRNA-target DNA sequences that possess the same GC content.

To further understand how single mismatches affect the reconfiguration rate, we considered how  $\nu$  varies as a function of the number and location of mismatches present. First, we show in Fig. 5D that no significant binding observed for sequences containing more than 4 mismatches in the seed region. Our analysis, however, reveals that formation of a stable ternary complex does occur in the presence of 1, 2 or 3 mismatches ( $P = 1 \times 10^{-232}$ ,  $8 \times 10^{-94}$ , and  $1 \times 10^{-15}$ , respectively; null-hypothesis=no binding will occur for 1, 2, of 3 mismatches). It is important to note that by performing aggregate measurement across thousands of crRNA and DNA sequences, our results confers a much stronger statistical predictive power than other assays that only test a limited number of crRNA-DNA partners. In addition, we also show in Fig. 5E that mismatches have the greatest impact when located within the first 6 bases of the seed region. Sensitivity to a mismatch decreases with distance from the PAM site, and mismatches located in the trunk region (bases 6-12) only minimally impact DNA binding.

We next considered whether the type of mismatch



463 affects  $\nu$  in Fig. 5F. Surprisingly, we find that single  
464 crRNA-DNA mismatches of the form dC:rC decrease  
465  $\nu$  by an additional 26% on average. In contrast, dT:rU  
466 and dG:rG mismatches are tolerated and increase the  
467 reconfiguration rate by 9.5% and 24% compared to all  
468 types of single-base mismatch, respectively. This ef-  
469 fect can be visualized in Fig. 5B, where off-diagonal  
470 elements that correspond to a single mismatch in  
471 the sixth location are more prominent in the lower  
472 right quadrant than those in the upper left quadrant  
473 (the upper left quadrant corresponds to a dC:rC mis-  
474 match while the lower right corresponds to dG:rG mis-  
475 matches). Insensitivity to wobble-transition mismatch  
476 has been previously reported in SpCas9 [21, 46] and  
477 AsCas12a [19], but other work in AsCas12a found no  
478 significant effect due to a transversion mismatch [19],  
479 suggesting tolerance to transversion mismatches may  
480 be unique to FnCas12a.

## 481 DISCUSSION

482 We have established that massively parallel  
483 CRISPRi assays, with their ability to rapidly measure  
484 thousands of different crRNA-target DNA variants in  
485 parallel, are a viable method to assess dCas12 binding  
486 efficiencies. Our results reveal the fundamental  
487 relationship between crRNA-DNA interactions and the  
488 underlying energy landscape that dictates binding be-  
489 havior of dCas12. One major outcome of this study is  
490 that binding of DNA by CRISPR-Cas12a endonucle-  
491 ase does not strongly depend on the specific crRNA  
492 sequence used (at least within the set of tested se-  
493 quences which were kept at 50% GC content). Rather,  
494 variance in DNA binding affinities depends on the PAM  
495 sequence, the presence of mismatches, and the type  
496 of mismatch present. Indeed, the propensity of iden-  
497 tical DNA targets to be recognized by a CRISPR-Cas  
498 nuclease matching crRNA may be significantly differ-  
499 ent depending on their respective 6-base PAM se-  
500 quence. Similarly, the absolute number of mismatches  
501 in the seed region of a crRNA-DNA hybrid is more im-  
502 portant than their specific location, and mismatches  
503 that occur in the distal region of a crRNA (i.e. after  
504 base 17) do not significantly affect binding affinity. Our  
505 results also show that dT:rU and dG:rG mismatches  
506 are tolerated at a higher level than dA:rA and dC:rC  
507 mismatch.

508 Beyond that, the power of our approach also re-  
509 sides in our ability to use a parameter-free statistical  
510 mechanics framework to extract thermodynamic de-  
511 terminants of dCas12a binding. Importantly, our re-  
512 sults are not specific to nuclease-dead CRISPR-Cas  
513 endonucleases—we confirm in Fig. S7 that the same  
514 behavior is observed for *catalytically-active* Cas12a  
515 nuclease—and our approach should foster the devel-  
516 opment of predictive, parameter-free biophysical mod-  
517 els of on- and off-target binding affinities and DNA

518 cleavage activities. In addition, because CRISPR-Cas  
519 systems are very common amongst prokaryotes [1],  
520 there is a need for the rapid and efficient characteri-  
521 zation of newly-sequenced CRISPR-Cas systems that  
522 may display enhanced target differentiation capabili-  
523 ties or alternative PAM site compositions. We antic-  
524 ipate that this method will also provide a mechanis-  
525 tic understanding of the thermodynamic determinants  
526 of DNA target recognition and binding affinities in un-  
527 characterized CRISPR-Cas endonucleases and other  
528 nucleic-acid binding enzymes.

529 Because our method is applicable to both the cat-  
530 alytically active and dead versions of the nuclease,  
531 it should also lead to improvements in a vast range  
532 of CRISPR applications, including *in vivo* gene edit-  
533 ing, programmable repression, and nucleic acid de-  
534 tection. Our multiplexed approach is particularly ap-  
535 plicable to the advancement of dCas-based gene cir-  
536 cuit elements, which can be used to create com-  
537 plex circuits that behave orthogonally, operating in-  
538 dependently without crosstalk [47–51]. Furthermore,  
539 our approach can expedite the rational design of en-  
540 hanced CRISPR nucleases and facilitate the develop-  
541 ment of CRISPR-Cas variants with greater specificity,  
542 improved proofreading capabilities, or increased activ-  
543 ities [52–57].

## 544 ACKNOWLEDGEMENTS

## 545 AUTHOR CONTRIBUTIONS

546 Conceptualization, G.L. and D.A.S.; Methodology,  
547 D.A.S. and G.L.; Formal Analysis, D.A.S. and G.L.;  
548 Investigation, D.A.S., Y.X., and G.L.; Writing – Orig-  
549 inal Draft, G.L. and D.A.S.; Writing – Review & Editing,  
550 G.L., D.A.S., and Y.X.; Supervision, G.L.;

## 551 DECLARATION OF INTERESTS

552 The authors declare no competing interests.



- 553 [1] Mohanraju, P. *et al.* Diverse evolutionary roots and mechanistic  
554 variations of the CRISPR-Cas systems. *Science* **353**, aad5147  
555 (2016).
- 556 [2] Barrangou, R. & Doudna, J. A. Applications of CRISPR tech-  
557 nologies in research and beyond. *Nature Biotechnology* **34**,  
558 933–941 (2016).
- 559 [3] Zetsche, B. *et al.* Cpf1 Is a Single RNA-Guided Endonuclease  
560 of a Class 2 CRISPR-Cas System. *Cell* **163**, 759–771 (2015).
- 561 [4] Zetsche, B. *et al.* Multiplex gene editing by CRISPR-Cpf1 using  
562 a single crRNA array. *Nature Biotechnology* **35**, 31–34 (2017).
- 563 [5] Qi, L. S. *et al.* Repurposing CRISPR as an RNA-Guided Plat-  
564 form for Sequence-Specific Control of Gene Expression. *Cell*  
565 **152**, 1173–1183 (2013).
- 566 [6] Bikard, D. *et al.* Programmable repression and activation of  
567 bacterial gene expression using an engineered CRISPR-Cas  
568 system. *Nucleic Acids Research* **41**, 7429–7437 (2013).
- 569 [7] Kim, S. K. *et al.* Efficient Transcriptional Gene Repression by  
570 Type V-A CRISPR-Cpf1 from *Eubacterium eligens*. *ACS syn-  
571 thetic biology* **6**, 1273–1282 (2017).
- 572 [8] Chen, J. *et al.* CRISPR-Cas12a target binding unleashes indis-  
573 criminate single-stranded DNase activity. *Science* **360**, 436–  
574 439 (2018).
- 575 [9] Gootenberg, J. S. *et al.* Multiplexed and portable nucleic acid  
576 detection platform with Cas13, Cas12a, and Csm6. *Science*  
577 **360**, 439–444 (2018).
- 578 [10] Komor, A. C., Kim, Y. B., Packer, M. S., Zuris, J. A. & Liu, D. R.  
579 Programmable editing of a target base in genomic DNA without  
580 double-stranded DNA cleavage. *Nature* **533**, 420–424 (2016).  
581 URL <https://www.nature.com/articles/nature17946>.
- 582 [11] Gaudelli, N. M. *et al.* Programmable base editing of A•T to  
583 G•C in genomic DNA without DNA cleavage. *Nature* **551**,  
584 464–471 (2017). URL [https://www.nature.com/articles/  
585 nature24644](https://www.nature.com/articles/nature24644).
- 586 [12] Kuscu, C., Arslan, S., Singh, R., Thorpe, J. & Adli, M. Genome-  
587 wide analysis reveals characteristics of off-target sites bound  
588 by the Cas9 endonuclease. *Nature Biotechnology* **32**, 677–  
589 683 (2014).
- 590 [13] Wu, X. *et al.* Genome-wide binding of the CRISPR endonu-  
591 clease Cas9 in mammalian cells. *Nature Biotechnology* **32**,  
592 670–676 (2014).
- 593 [14] O’Geen, H., Henry, I. M., Bhakta, M. S., Meckler, J. F. & Se-  
594 gal, D. J. A genome-wide analysis of Cas9 binding specificity  
595 using ChIP-seq and targeted sequence capture. *Nucleic Acids  
596 Research* **43**, 3389–3404 (2015).
- 597 [15] Doench, J. G. *et al.* Rational design of highly active sgRNAs  
598 for CRISPR-Cas9-mediated gene inactivation. *Nature Biotech-  
599 nology* **32**, 1262–1267 (2014).
- 600 [16] Doench, J. G. *et al.* Optimized sgRNA design to maximize ac-  
601 tivity and minimize off-target effects of CRISPR-Cas9. *Nature  
602 Biotechnology* **34**, 184–191 (2016).
- 603 [17] Haeussler, M. *et al.* Evaluation of off-target and on-target scor-  
604 ing algorithms and integration into the guide RNA selection tool  
605 CRISPOR. *Genome Biology* **17**, 148 (2016).
- 606 [18] Tycko, J., Myer, V. & Hsu, P. Methods for Optimizing CRISPR-  
607 Cas9 Genome Editing Specificity. *Molecular Cell* **63**, 355–370  
608 (2016).
- 609 [19] Kim, H. K. *et al.* *In vivo* high-throughput profiling of  
610 CRISPR–Cpf1 activity. *Nature Methods* **14**, 153–159 (2017).
- 611 [20] Kim, H. K. *et al.* Deep learning improves prediction of  
612 CRISPR–Cpf1 guide RNA activity. *Nature Biotechnology* **36**,  
613 239–241 (2018).
- 614 [21] Sternberg, S. H., Redding, S., Jinek, M., Greene, E. C. &  
615 Doudna, J. A. DNA interrogation by the CRISPR RNA-guided  
616 endonuclease Cas9. *Nature* **507**, 62–67 (2014).
- 617 [22] Szczelkun, M. D. *et al.* Direct observation of R-loop formation  
618 by single RNA-guided Cas9 and Cascade effector complexes.  
619 *Proceedings of the National Academy of Sciences* **111**, 9798–  
620 9803 (2014).
- 621 [23] Hua Fu, B. X., Hansen, L. L., Artilles, K. L., Nonet, M. L. & Fire,  
622 A. Z. Landscape of target:guide homology effects on Cas9-  
623 mediated cleavage. *Nucleic Acids Research* **42**, 13778–13787  
624 (2014).
- 625 [24] Singh, D. *et al.* Real-time observation of DNA target interro-  
626 gation and product release by the RNA-guided endonuclease  
627 CRISPR Cpf1 (Cas12a). *Proceedings of the National Academy  
628 of Sciences of the United States of America* **115**, 5444–5449  
629 (2018).
- 630 [25] Duan, J. *et al.* Genome-wide identification of CRISPR/Cas9  
631 off-targets in human genome. *Cell Research* **24**, 1009–1012  
632 (2014).
- 633 [26] Kleinstiver, B. P. *et al.* Genome-wide specificities of CRISPR-  
634 Cas Cpf1 nucleases in human cells. *Nature Biotechnology* **34**,  
635 869–874 (2016).
- 636 [27] Kim, D. *et al.* Genome-wide analysis reveals specificities of  
637 Cpf1 endonucleases in human cells. *Nature Biotechnology* **34**,  
638 863–868 (2016).
- 639 [28] Singh, R., Kuscu, C., Quinlan, A., Qi, Y. & Adli, M. Cas9-  
640 chromatin binding information enables more accurate CRISPR  
641 off-target prediction. *Nucleic Acids Research* **43**, e118 (2015).
- 642 [29] Xu, H. *et al.* Sequence determinants of improved CRISPR

- 643 sgRNA design. *Genome Research* **25**, 1147–1157 (2015). 690 coli. *Nucleic Acids Research* **41**, e204 (2013).
- 644 [30] Wong, N., Liu, W. & Wang, X. WU-CRISPR: characteristics of 691 [45] Tóth, E. *et al.* Mb- and FnCpf1 nucleases are active in mam-  
645 functional guide RNAs for the CRISPR/Cas9 system. *Genome* 692 malian cells: activities and PAM preferences of four wild-type  
646 *Biology* **16**, 218 (2015). 693 Cpf1 nucleases and of their altered PAM specificity variants.  
694 *Nucleic Acids Research* **46**, 10272–10285 (2018).
- 647 [31] Zhang, D., Hurst, T., Duan, D. & Chen, S.-J. Unified energetics 695 [46] Tsai, S. Q. *et al.* GUIDE-seq enables genome-wide profil-  
648 analysis unravels SpCas9 cleavage activity for optimal gRNA 696 ing of off-target cleavage by CRISPR-Cas nucleases. *Nature*  
649 design. *Proceedings of the National Academy of Sciences* **116**, 697 *Biotechnology* **33**, 187–197 (2015).
- 650 8693–8698 (2019).
- 651 [32] Wang, T. *et al.* Pooled CRISPR interference screening enables 698 [47] Jusiak, B., Cleto, S., Perez-Piñera, P. & Lu, T. K. Engineering  
652 genome-scale functional genomics study in bacteria with su- 699 Synthetic Gene Circuits in Living Cells with CRISPR Technol-  
653 perior performance. *Nature Communications* **9**, 2475 (2018). 700 ogy. *Trends in Biotechnology* **34**, 535–547 (2016).
- 654 [33] Guo, J. *et al.* Improved sgRNA design in bacteria via genome- 701 [48] Didovyk, A., Borek, B., Tsimring, L. & Hasty, J. Transcrip-  
655 wide activity profiling. *Nucleic Acids Research* **46**, 7052–7069 702 tional Regulation with CRISPR-Cas9: Principles, Advances,  
656 (2018). 703 and Applications. *Current opinion in biotechnology* **40**, 177–  
704 184 (2016).
- 657 [34] Marshall, R. *et al.* Rapid and Scalable Characterization of 705 [49] Didovyk, A., Borek, B., Hasty, J. & Tsimring, L. Orthogo-  
658 CRISPR Technologies Using an E. coli Cell-Free Transcription- 706 nally Modular Gene Repression in Escherichia coli Using Engi-  
659 Translation System. *Molecular Cell* **69**, 146–157.e3 (2018). 707 neered CRISPR/Cas9. *ACS synthetic biology* **5**, 81–88 (2016).
- 660 [35] Boyle, E. A. *et al.* High-throughput biochemical profiling re- 708 [50] Nielsen, A. A. K. & Voigt, C. A. Multi-input CRISPR/Cas ge-  
661 veals sequence determinants of dCas9 off-target binding and 709 netic circuits that interface host regulatory networks. *Molecular*  
662 unbinding. *Proceedings of the National Academy of Sciences* 710 *Systems Biology* **10**, 763 (2014).
- 663 of the United States of America **114**, 5461–5466 (2017).
- 664 [36] Jeon, Y. *et al.* Direct observation of DNA target searching 711 [51] Cress, B. F. *et al.* Rapid generation of CRISPR/dCas9-  
665 and cleavage by CRISPR-Cas12a. *Nature Communications* 712 regulated, orthogonally repressible hybrid T7-lac promoters for  
666 **9**, 2777 (2018). 713 modular, tuneable control of metabolic pathway fluxes in Es-  
714 cherichia coli. *Nucleic Acids Research* **44**, 4472–4485 (2016).
- 667 [37] Stella, S. *et al.* Conformational Activation Promotes CRISPR- 715 [52] Chen, J. S. *et al.* Enhanced proofreading governs  
668 Cas12a Catalysis and Resetting of the Endonuclease Activity. 716 CRISPR–Cas9 targeting accuracy. *Nature* **550**, 407–410  
669 *Cell* **175**, 1856–1871.e21 (2018). 717 (2017).
- 670 [38] Brewster, R. *et al.* The Transcription Factor Titration Effect Dic- 718 [53] Slaymaker, I. M. *et al.* Rationally engineered Cas9 nucleases  
671 tates Level of Gene Expression. *Cell* **156**, 1312–1323 (2014). 719 with improved specificity. *Science* **351**, 84–88 (2016).
- 672 [39] Weinert, F. M., Brewster, R. C., Rydenfelt, M., Phillips, R. & 720 [54] Kleinstiver, B. P. *et al.* High-fidelity CRISPR–Cas9 nucleases  
673 Kegel, W. K. Scaling of Gene Expression with Transcription- 721 with no detectable genome-wide off-target effects. *Nature* **529**,  
674 Factor Fugacity. *Physical Review Letters* **113**, 258101 (2014). 722 490–495 (2016).
- 675 [40] Landman, J., Brewster, R. C., Weinert, F. M., Phillips, R. & 723 [55] Casini, A. *et al.* A highly specific SpCas9 variant is identified by  
676 Kegel, W. K. Self-consistent theory of transcriptional control in 724 *in vivo* screening in yeast. *Nature Biotechnology* **36**, 265–271  
677 complex regulatory architectures. *PLOS ONE* **12**, e0179235 725 (2018).
- 678 (2017).
- 679 [41] Jones, D. L. *et al.* Kinetics of dCas9 target search in Es- 726 [56] Hu, J. H. *et al.* Evolved Cas9 variants with broad PAM compat-  
680 cherichia coli. *Science* **357**, 1420–1424 (2017). 727 ibility and high DNA specificity. *Nature* **556**, 57–63 (2018).
- 681 [42] Cleveland, W. S. Robust Locally Weighted Regression and 728 [57] Kleinstiver, B. P. *et al.* Engineered CRISPR–Cas12a vari-  
682 Smoothing Scatterplots. *Journal of the American Statistical* 729 ants with increased activities and improved targeting ranges  
683 *Association* **74**, 829–836 (1979). 730 for gene, epigenetic and base editing. *Nature Biotechnology*  
731 **37**, 276 (2019).
- 684 [43] Law, C. W., Chen, Y., Shi, W. & Smyth, G. K. voom: precision 732 weights unlock linear model analysis tools for RNA-seq read  
685 counts. *Genome Biology* **15**, R29 (2014). 733
- 686
- 687 [44] Li, X.-t., Thomason, L. C., Sawitzke, J. A., Costantino, N. & 734 Court, D. L. Positive and negative selection using the tetA-sacB  
688 cassette: recombineering and P1 transduction in Escherichia  
689 coli.

## I. EXPERIMENTAL METHODS

**Assembly of the CRISPR-Cas12a plasmid backbone.** Unless indicated otherwise, all experiments were conducted using a plasmid backbone which constitutively expresses dCas12a (*Francisella novicida*) and tetA/sacB. This plasmid was assembled using standard Gibson assembly techniques from components sourced from several other plasmids: pY003 (pFnCpf1\_delta Cas) was a gift from Feng Zhang (Addgene plasmid # 69974), pTKLP-tetA was a gift from Thomas Kuhlman (Addgene plasmid # 71325), and pKM154 was a gift from Kenan Murphy (Addgene plasmid # 13036), using a backbone derived from pUA66 [1]. FnCas12a was made to be catalytically inactive via two mutations, D917A and E1006A performed using NEB's Q5 site-directed mutagenesis kit. The landing pad sequence needed for Illumina sequencing was inserted using an IDT gBlock gene fragment (Supplementary Table 1). The entire plasmid sequence (pDS1.04) can be found here: <https://benchling.com/s/seq-I9k4w1wRsX3B3cXVzyE2>.

**Design of PAM and gRNA mismatch assays.** In order to test the effects of PAM and gRNA mismatches at a large scale, we created a highly compact dCas12a repressing element such that target and gRNA properties could be changed with a single site-directed mutagenesis. The sequence of this compact element can be found here: <https://benchling.com/s/seq-BAWu6Ya1kAnhxugFEezi>.

**Assembly of plasmid libraries.** Our method of exploring CRISPR interference is predicated on the use of large, randomized oligos in order to produce many mismatch combinations via site-directed mutagenesis. Oligos for PCR-based assembly of different guide:target variants were purchased from Thermo Fisher; oligos containing randomized bases were PAGE-purified and all others were ordered as desalted oligo plates. Oligonucleotide sequences are listed in Supplemental Table 1. PAGE-purified oligos were ordered phosphorylated by the manufacturer. Unphosphorylated oligos from plates were pooled together (according to their forward-reverse directions) and phosphate groups were added using Thermo Fisher's T4 Polynucleotide Kinase (T4 PNK).

Pooled or randomized phosphorylated oligos were used to insert multiple crRNA and target DNA combinations in a single PCR step. Likely due to the large size of the insertion, we had a significant amount of difficulty finding parameters which resulted in complete PCR products. Parameters that worked were found serendipitously and include a high molar ratio of template to primers and extremely long (15min+) extension times. PCR was done exclusively using Q5 hot start DNA polymerase from NEB.

For cloning of single constructs, ligation and phosphorylation was accomplished using the Ki-

nase+Ligase+DpnI (KLD) mix from NEB's site-directed mutagenesis kit. In the multiplexed experiments (except when noted below), ligation was accomplished using NEB's ElectroLigase, using 100 ng of DNA from the PCR purified using Zymo's ZymoPURE Miniprep kit. Ligation was done according to the manufacturer's instructions, with a 60 minute incubation time at 25°C and a 15 minute inactivation step at 65°C. Ligated product was either used immediately for transformation or frozen for future use.

The catalytically active Cas12a experiment was cloned using a library derived from the Kanamycin-selected control in the catalytically-dead experiment, since this was of known good coverage for all mismatch combinations. D917A and E1006A mutations in dCas12a in pDS1.04 were reverted using site-directed mutagenesis, and the catalytically-restored Cas12a was inserted into the linearized backbone with all 4,096 variants in lieu of the catalytically-dead CRISPR via assembly with NEB Hifi DNA assembly Master Mix.

Insertions for the promoter/target and target/target spacing experiments were done using two rounds of PCR, the first one to add a functioning inverter element and the second one to add one or two PAM+target DNA sequences. Primer sequences are listed in Supplementary Table 1.

**Electroporation of plasmid libraries.** In order to achieve the transformation efficiencies required for good statistical coverage of all mismatch combinations in our multiplexed experiments, we used electroporation of our CRISPR mismatch libraries. 1  $\mu$ L of electroligated product was added to 25  $\mu$ L Lucigen Endura ElectroCompetent cells, and then electroporated at 1400V (BTX ECM399 Device). Cells were recovered in 2mL of Lucigen recovery media, as in [2]. Following the one-hour recovery, the full 2mL was transferred to 23 mL of Terrific Broth (TB) with kanamycin in a 50 mL tube. TB was made by autoclaving 23.8 g of VWR's Terrific Broth powder with 2 mL of glycerol and 500 mL of purified water. Since the Endura cells are so densely packed, the resulting recovery product has a nonzero OD of roughly 0.3. Once the tubes reached an OD of 1.0 (approximately 8 hours at 37C, 225 rpm), each pair of tubes was combined in a flask and 1 mL of that product was used to inoculate each of the selection conditions.

**Sucrose and tetracycline selection.** Inoculated selection media (100mL) were grown in 250 mL flasks (37C, 225 rpm) until they reached an OD of 1.0, then cooled to 4°C prior to plasmid extraction. Unselective media (the control condition) is TB with Kanamycin (50 $\mu$ g/mL). Tetracycline-selective media (TK - indicating both kanamycin and tetracycline) was produced in the same way, adding tetracycline at a concentration of 10 $\mu$ g/mL. Sucrose-selective media (SK) was produced by combining 10mL of an autoclaved sucrose



116 premix solution (22.5 g sucrose in 37.5 mL water) with  
117 a TB premix solution such that the resulting solution  
118 contains 4.5% sucrose (w/v).

119 Plasmid extraction was done using Zymo's ZymoP-  
120 URE II Midiprep kit according to the manufacturer's  
121 instructions. Plasmids were then eluted in elution  
122 buffer and stored at -20°C prior to indexing for Next-  
123 Generation Sequencing.

124 While Li *et al.* utilize dual sensitivity to both sucrose  
125 and fusaric acid [3], we found no selective advantage  
126 due to the use of fusaric acid, and did not utilize it  
127 beyond preliminary experiments.

128  
129 **Next-Generation Sequencing and Analysis.** Our  
130 method is made possible by the inclusion of se-  
131 quences flanking the inverter site of interest (see the  
132 pDS1.04 sequence) to which Illumina indexing primers  
133 can bind. This allows us to lift out purely the se-  
134 quences of interest using PCR, skipping most tradi-  
135 tional library preparation steps. Indexes were added to  
136 our samples using primers from NEB's NEBNext Mul-  
137 tiplex Oligos for Illumina (Index Primers Set 1), using  
138 NEBNext Q5 Hot Start HiFi PCR Master Mix or NEB-  
139 Next Ultra II Q5 Master Mix.

140 Sequencing was either performed using Illumina's  
141 MiSeq System from the Cornell Genomics Facility  
142 (150 bp kit, PE 2 x 75 bp) or an Illumina iSeq instru-  
143 ment in our own laboratory (2 x 150 bp run). Due to  
144 the extremely low complexity of these libraries, a 10%  
145 PhiX spike-in was used in both cases.

146 Results were analyzed using scripts written in  
147 Python, which can be made available upon request.  
148 Only reads that perfectly matched the correct design  
149 in the sequencing window were counted in the final  
150 result to calculate the relative fraction of each con-  
151 struct in the sequenced populations.

152  
153 **Fluorescence Measurements of Protein Fold-  
154 change.** In initial fluorescence measurement ex-  
155 periments, plasmids containing dCas12a, guide RNA  
156 sequence, and a GFP target were transformed into  
157 NEB's 5-alpha Competent *E. coli* (High Efficiency) and  
158 recovered in SOC according to the manufacturer's in-  
159 structions. Initial assessment of repression efficacy  
160 was made by visual inspection of cells grown on LB  
161 plates. The sequences of these plasmids can be found  
162 here:

- 163 • GFP Control: <https://benchling.com/s/seq-D4cjbT6qdnF7b0it9Poa>
- 164 • Single Inverter: <https://benchling.com/s/seq-UtdJRWJ4oUW35cptcnjZ>
- 165
- 166

167 Quantitative measurements of fluorescence (used  
168 to produce Fig. 2B) were made using a Synergy H1  
169 Hybrid Multi-Mode Microplate Reader, produced by  
170 BioTek. Reported fold-change corresponds to asymp-  
171 totic fold-change observed after roughly five hours  
172 of growth in 200uL TB at 37C. GFP fluorescence

173 measurements are corrected by subtracting out the  
174 measured green emittance from cells at the same OD  
175 which entirely lack GFP.

176  
177 **ddPCR Measurement of mRNA fold-change.**  
178 mRNA fold-change was measured using droplet  
179 digital PCR (ddPCR) measurements. Transformed  
180 cells were grown in 20 mL TB for 12 hours at 37C  
181 and 300uL was then used for RNA extraction using  
182 Zymo's Direct-zol RNA MiniPrep. Genomic DNA was  
183 removed using Thermo's TURBO DNA-free Kit and  
184 10ng of cleaned RNA was then used as a template for  
185 cDNA production, utilizing the ProtoScript II Reverse  
186 Transcriptase kit from NEB and primer RT\_GFP\_Rev  
187 from Supplementary Table 1.

188 Droplet generation was done using a QX200  
189 Droplet Generator produced by Bio-Rad. PCR ampli-  
190 cation was done using a C1000 Touch Thermal Cycler  
191 (Bio-Rad) utilizing EvaGreen Supermix and following  
192 the manufacturer's instructions. Primers correspond-  
193 ing to the GFP target are listed in Supplementary  
194 Table 1. Results are read out on a Qx200 Droplet  
195 Reader. Data analysis from ddPCR was completed  
196 using QuantaSoft software made available by the  
197 Cornell Genomics Center.

198  
199 **Measurement of cell growth as a function of su-  
200 crose and tetracycline concentration.** The Synergy  
201 H1 microplate reader was used to produce growth  
202 curves for cell growth in the presence of sucrose and  
203 tetracycline. Cells with sacB (pDS1.04) were tested  
204 with varying concentrations of sucrose and cells lack-  
205 ing tetA were tested against varying concentrations  
206 of tetracycline. Cells were grown in 200uL TB at  
207 37C. Growth rates reported in Supplementary Figure  
208 2 are the result of a logistic curve fit to the optical  
209 density measurement, fixed such that each curve has  
210 a constant starting OD.

211  
212 **PAM site sequence logo.** Since sequencing cover-  
213 age was in excess of 100x for most sequences, all  
214 sequences were still detected under SK conditions,  
215 including those that had a  $\Lambda_i = 0$  growth rate. Hence,  
216 to generate the sequence logo and final base density  
217 in Fig. 3D and E that were not tainted with those  $\Lambda = 0$   
218 sequences, simulated counts  $SK'_i$  were used instead  
219 of the measured counts  $SK_i$ . These simulated counts  
220  $SK'_i$  were computed from K-condition counts  $K_i$   
221 according to  $SK'_i = K_i e^{\Lambda_i T}$ , where  $T=17.5/\Lambda_0$ , an  
222 arbitrary growth time, and  $\Lambda_i$  is the growth rate of each  
223 PAM sequence (see *Growth rate from sequencing  
224 counts* section below). Then, sequence logos were  
225 computed from  $baseheight = f_{b,i} R_i$ , where  $f_{b,i}$  is  
226 the relative frequency of base  $b$  at position  $i$  and  
227  $R_i = \log_2(4) - \sum_b (-f_{b,i}) \log_2(f_{b,i})$ .

228  
229 **Statistical analysis and confidence interval evalu-  
230 ation.** While it is prohibitive to replicate next gen-



231 eration sequencing experiments, there are independent  
 232 replicates within a single experiment with different  
 233 selection conditions from which we can extract a  
 234 variance as a function of the number of counts from  
 235 next generation sequencing. Specifically, independent  
 236 replicates are sourced from the K and TK selection  
 237 conditions with 6 mismatches in the seed region, for  
 238 which we expect there to be no effective repression by  
 239 dCas12a.

240 We utilize the transformation  $\log_2(\text{counts})$  :  
 241  $\sqrt{\text{standard deviation}}$  previously used by other authors  
 242 for RNA seq counts [4]. This transformation is then  
 243 fit using LOESS [5] via its python implementation [6].  
 244 Variance falls with the log of the number of counts (as  
 245 would be expected from Poisson statistics) but then  
 246 asymptotes for large counts.

247 **Data Availability.** The raw fastq files from sequencing  
 248 and data generated during this study are avail-  
 249 able at <https://www.ncbi.nlm.nih.gov/Traces/study/?acc=PRJNA549693>.

## 251 II. MASSIVELY PARALLEL CRISPR INTERFERENCE 252 ASSAY

253 **Growth rate from sequencing counts.** Each exper-  
 254 iment contains a total of  $n$  different crRNA:DNA com-  
 255 binations. The total number of transformant after plas-  
 256 mid assembly is  $M_T = \sum_{i=1}^n x_i$ , where  $x_i$  is the num-  
 257 ber of cells with a specific crRNA-target DNA combi-  
 258 nation  $i$ . If the assembly of each feature  $x_i$  does not  
 259 depend on the underlying DNA sequence, the distri-  
 260 bution of  $x_i$  will be given by a Poisson distribution with  
 261 rate  $\frac{M_T}{n}$ .

262 The sample is then grown under two different selec-  
 263 tion conditions (K and SK) until it reaches an optical  
 264 density  $OD_{600}=1$ . The time needed for each the pop-  
 265 ulation to reach  $OD_{600}=1$  in each condition is given by  
 266  $\tau_K$  and  $\tau_S$ , respectively. Plasmids are collected when  
 267 each flask reaches  $OD=1$  and the region containing  
 268 the crRNA and target DNA coding sequence is ampli-  
 269 fied using NEBNext Multiplex Oligos for Illumina (Index  
 270 Primers Set 1).

271 Each sample is then sequenced using either the  
 272 Miseq or iSeq 100 platform, and the number of times  
 273 each crRNA-target DNA combination  $i$  is present in  
 274 the population after selection is denoted by  $K_i$ ,  $S_i$ ,  
 275 and  $T_i$ . Each feature  $i$  will grow at a rate  $\Lambda_s^i$  under  
 276 SK selection and at a constant rate  $\Lambda_k^i = \Lambda_0$  under K  
 277 selection.

278 We define the relative fraction of each feature  $i$  in  
 279 each condition according to:

$$\begin{cases} k_i = \frac{K_i}{\sum_i^n K_i} = \frac{x_i e^{\Lambda_0 \tau_k}}{M_1} \\ s_i = \frac{S_i}{\sum_i^n S_i} = \frac{x_i e^{\Lambda_s^i \tau_s}}{M_1} \end{cases} \quad (3)$$

280 where  $M_1$  is the number of cells at the end of the  
 281 experiment when the flask reaches  $OD=1$ .

282 To find the effective growth rate  $\Lambda_s^i$  under SK-  
 283 condition for all other features  $i$ , we can re-arrange  
 284 eqn. 3 to get

$$\Lambda_s^i = \frac{\log\left(\frac{s_i}{k_i}\right) + \Lambda_0 \tau_k}{\tau_s} \quad (4)$$

### 285 Determining the growth time $\tau_k$ under K-selection.

286 A subset of the population will not fully repress the  
 287 tetA-sacB cassette and will not grow in SK conditions.  
 288 This happens, for example, when the crRNA/target  
 289 DNA hamming distance is 6. If we denote the pop-  
 290 ulation fraction under K and SK selection conditions of  
 291 this non-growing subpopulation as  $s_-$  and  $k_-$ , we get

$$\begin{cases} k_- = \frac{x_i \exp(\Lambda_0 \tau_k)}{M_1} \\ s_- = \frac{x_i}{M_1} \end{cases} \quad (5)$$

292 Using this, we can find the time  $\tau_k$  cells were grow-  
 293 ing under K-selection from the ratio  $\frac{s_-}{k_-}$  and obtain

$$\tau_k = -\frac{1}{\Lambda_0} \log\left(\frac{s_-}{k_-}\right) \quad (6)$$

### 294 Determining the growth time $\tau_s$ under SK-

295 **selection.** Next, consider the subpopulation that is  
 296 expected to grow at the same rate in either condition,  
 297 which should occur when the crRNA/target DNA Ham-  
 298 ming distance is zero. Using the population fractions  
 299 in the K and SK conditions for this subpopulation (la-  
 300 beled  $s_+$  and  $k_+$ , respectively), we can use Eqn. 3 to  
 301 find  $\tau_s$ :

$$\tau_s = \frac{1}{\Lambda_0} \log\left(\frac{s_+}{k_+}\right) + \tau_k \quad (7)$$

302 Here, we assumed that  $\Lambda_s^i$  (the growth rate under  
 303 SK conditions) is equal to  $\Lambda_0$  (the growth rate under  
 304 K conditions) for all combinations  $i$  with a hamming  
 305 distance of zero.

### 306 Determining the growth rate $\Lambda_s$ under SK-

307 **selection.** Having derived expressions for  $\tau_k$  and  $\tau_s$ ,

we can expand eqn. 4 to get an expression for the relative growth rate  $\lambda_s^i \equiv \frac{\Lambda_s^i}{\Lambda_0}$  in terms of the  $s_{\pm}$  and  $k_{\pm}$  population fractions:

$$\lambda_s^i \equiv \frac{\Lambda_s^i}{\Lambda_0} = \frac{\log\left(\frac{s_i}{k_i}\right) - \log\left(\frac{s_-}{k_-}\right)}{\log\left(\frac{s_+}{k_+}\right) - \log\left(\frac{s_-}{k_-}\right)} \quad (8)$$

**Determining the growth rate  $\Lambda_t$  under TK-selection.** Using a similar approach, we also derive an analogous expression of the growth rate  $\Lambda_t^i$  under TK-selection, assuming the  $t_+$  cells grow in TK when Hamming=6 and the  $t_-$  cells do not grow when Hamming = 0. Specifically, we get:

$$\lambda_t^i \equiv \frac{\Lambda_t^i}{\Lambda_0} = \frac{\log\left(\frac{t_i}{k_i}\right) - \log\left(\frac{t_-}{k_-}\right)}{\log\left(\frac{t_+}{k_+}\right) - \log\left(\frac{t_-}{k_-}\right)} \quad (9)$$

**Determining the initial population sizes  $x_i$ .** While the size of each founding population  $x_i$  cancels out in our analysis, we still need to find its probabilistic distribution in order to compute its expected variance from the measured number of counts. Specifically, if we consider the measured population fraction under K-selection:

$$k_i = \frac{x_i \exp(\Lambda_0 \tau_k)}{M_1}$$

we note that since the factor  $\frac{\exp(\Lambda_0 \tau_k)}{M_1}$  is common to all sequences, we can set  $x_i = k_i$ .

### III. THERMODYNAMIC MODEL OF CRISPR-CAS BINDING

**Measuring dCas occupancy from the grand canonical ensemble.** To measure the effective dCas occupancies  $\theta_c$  for the tested targets, we use an auxiliary reporter system to measure the effective dCas occupancy  $\theta_c$ . Consider a simple CRISPR interference (CRISPRi) promoter architecture, where a protospacer adjacent motif (PAM) and a target DNA overlaps with the -35 or -10 consensus site of the promoter (Fig. 2). Binding of an RNA-guide CRISPR-Cas endonuclease with deactivated nuclease sites (dCas) to the promoter prevents initiation of RNA transcription by RNA polymerase (RNAP). In this scenario, the

binding energy of the CRISPR-Cas protein to its target DNA site is  $\epsilon_c$ , the RNAP binding energy is  $\epsilon_p$ , the PAM site binding energy is  $\epsilon_{PAM}$ , and the grand partition function of this system is [7]

$$\mathcal{Z} = 1 + \lambda_p e^{-\beta \epsilon_p} + \lambda_c e^{-\beta \epsilon_{PAM}} + \lambda_c e^{-\beta \epsilon_c} \quad (10)$$

where  $\beta = k_B T$ ,  $\mu_p$  and  $\mu_c$  are the RNAP and dCas chemical potentials  $\lambda_p = e^{\beta \mu_p}$  and  $\lambda_c = e^{\beta \mu_c}$  are the RNAP and dCas fugacities.

Using  $\mathcal{Z}$ , we derive an expression for the fold-change, defined as the ratio of the average number of absorbed RNAP molecules with and without repressor molecules [8], and get

$$FC = \frac{1}{1 + \lambda_c e^{-\beta \epsilon_c}} \quad (\lambda_p e^{-\beta \epsilon_p}, \lambda_c e^{-\beta \epsilon_{PAM}} \ll 1) \quad (11)$$

Here, we used the weak promoter limit  $\lambda_p e^{-\beta \epsilon_p} \ll 1$  because the RNAP typically initiates RNA transcription immediately after binding to the promoter [7] and does not occupy the promoter for a long time (i.e. it binds to the promoter in a manner that appears as though its binding energy is very weak). Similarly, we used a weak PAM binding limit  $\lambda_c e^{-\beta \epsilon_{PAM}} \ll 1$  because we assume that the dCas protein typically does not remain in the PAM-bound state for a long time (approximately 0.13s according to single-molecule studies [9]) and will only transition into a stable ternary complex if sufficient crRNA-DNA homology is found.

The average dCas occupancy is

$$\theta_c = \frac{\lambda_c e^{-\beta \epsilon_c}}{1 + \lambda_c e^{-\beta \epsilon_c}} \quad (\lambda_p e^{-\beta \epsilon_p}, \lambda_c e^{-\beta \epsilon_{PAM}} \ll 1) \quad (12)$$

In terms of the fold-change,  $\theta_c$  becomes

$$\theta_c = 1 - FC \quad (13)$$

Hence, starting from the fold-change, an easy to measure quantity, we can extract the effective occupancy probability of a RNA-guided dCas protein to its DNA target. In Fig. 2B, the fold-change for a perfectly matching crRNA-DNA hybrid measured using ddPCR is 1/123, meaning that the quantity  $\lambda_c e^{-\beta \epsilon_c} = 122$  and  $\theta_c = 122/123 = 99.2\%$ .

We can also extract the average PAM site occupancy  $\theta_{PAM}$  according to

$$\theta_{PAM} = \frac{\lambda_c e^{-\beta \epsilon_{PAM}}}{\mathcal{Z}} = \frac{\lambda_c e^{-\beta \epsilon_{PAM}}}{1 + \lambda_c e^{-\beta \epsilon_c}} \quad (14)$$

374 **Measuring dCas occupancy from transition state**  
 375 **theory.** The initial attachment step involves recognition  
 376 of a PAM site by a crRNA-loaded Cas12 endonu-  
 377 clease. This recognition step depends on the specific  
 378 PAM sequence, and leads to a conversion into a fully-  
 379 bound state with probability  $\nu$  if sufficient crRNA-target  
 380 DNA homology is found. Then, the only way for a  
 381 stably bound dCas protein to unbind its target DNA  
 382 is to be destabilized by the DNA replication machin-  
 383 ery [10]. Hence, given a PAM binding energy  $\epsilon_{PAM}$ ,  
 384 a (PAM) $\rightarrow$ (stable complex) transition probability given  
 385 by the reconfiguration rate  $\nu$ , and a growth rate  $\Lambda$ , we  
 386 obtain

$$\dot{N}_c = \nu N_{PAM} - \Lambda N_c \quad (15)$$

387 where  $N_c$  and  $N_{PAM}$  are the number of dCas proteins  
 388 bound to their target DNA and bound to the PAM site,  
 389 respectively.

390 At steady state, we note that  $N_{tot}\theta_{PAM} = N_{PAM}$  to  
 391 derive an expression for  $\theta_c$  and get

$$\theta_c = \frac{\nu}{\Lambda} \theta_{PAM} \quad (16)$$

392 To find  $\theta_{PAM}$ , we can extract the sequence-specific  
 393 binding energy  $\epsilon_{PAM} = \sum \epsilon_b^i$  by keeping the same  
 394 target DNA and measuring  $\theta_c$  for different PAM se-  
 395 quences. Specifically, a PAM sequence which devi-  
 396 ates from the canonical PAM site sequence will have a  
 397 binding energy given by  $\epsilon'_{PAM} = \epsilon_{canon} + \Delta\epsilon_{PAM}$ , which  
 398 will decrease the PAM occupancy  $\theta_{PAM}$  by a factor  
 399  $e^{-\beta\Delta\epsilon_{PAM}}$  in the weak PAM binding limit.

400 To find  $\nu$ , we first assume that the (PAM) $\rightarrow$ (stable  
 401 complex) transition occurs in a number of  $n$  discrete  
 402 steps, and each step  $i$  can only transition to either  
 403 state  $i - 1$  or  $i + 1$ . In this case, the transition rate  
 404 from state 1 state  $n$  is simply given by:

$$\nu = \kappa \cdot e^{-\beta \sum_i^{n-1} \Delta\epsilon_i} \quad (17)$$

405 where  $\Delta\epsilon_i = \epsilon_{i+1} - \epsilon_i$  and  $\kappa$  is a pre-exponential fac-  
 406 tor assumed to be constant for all experimental con-  
 407 ditions. However, if a crRNA-target DNA mismatch  
 408 exists at location  $i$ , the new binding energy will be  
 409  $\epsilon_i^* = \epsilon_i + \Delta\epsilon^*$  and the new rate  $\nu$  will be given by

$$\nu^* = \nu e^{-\beta\Delta\epsilon^*} \quad (18)$$

410 Combining equations 16 and 18, we obtain an ex-  
 411 plicit formulation of the relative binding probabilities  
 412 between two targets:

$$\frac{\theta'_c}{\theta_c} = \frac{\Lambda}{\Lambda'} e^{-\beta\Delta\epsilon_{PAM}} \cdot e^{-\beta\Delta\epsilon^*} \quad (19)$$

413 When measured in *E. coli* bacteria, both the DNA  
 414 replication rate and the thermodynamic determinants  
 415 of Cas12 binding will impact  $\theta'_c/\theta_c$ . We describe in the  
 416 next section how we untangle both effects using our  
 417 massively parallel CRISPRi assay.

418 In mammalian cells, on the other hand, DNA repli-  
 419 cation rates are not affected by CRISPR-Cas binding  
 420 (i.e.  $\Lambda = \Lambda'$ ). In this case, only the thermodynamic  
 421 determinant of Cas12 binding (i.e. the PAM attach-  
 422 ment probability and the reconfiguration rate) will have  
 423 an impact on DNA binding probabilities. Since DNA  
 424 binding is also directly related to DNA cleavage activ-  
 425 ity, the relative indel frequency between two targets is  
 426 thus given by

$$\text{Cleavage activity} \propto \frac{\theta'_c}{\theta_c} = e^{-\beta\Delta\epsilon_{PAM}} \cdot e^{-\beta\Delta\epsilon^*} \quad (20)$$

427 Thus, knowing the basic thermodynamic determi-  
 428 nants of Cas12 binding can help determine the relative  
 429 cleavage activity between any two DNA targets.

**dCas12 occupancies from growth rate.** The tetA-  
 sacB cassette is under the control of a dCas12  
 repressible promoter whose fold-change expression  
 (Eqn. 11) is given by

$$FC = \frac{1}{1 + \lambda_c e^{-\beta\epsilon}} \equiv f(\epsilon)$$

430 where the fugacity  $\lambda_c$  converges to the concentra-  
 431 tion of dCas12+crRNA binary complex in the [crRNA]  
 432  $\gg 1$  limit and  $\epsilon$  is the effective binding energy of the  
 433 stabilized dCas12+crRNA+DNA ternary complex.

434 We describe the kinetics of this system using this  
 435 system of ODE equations:

$$\begin{cases} \frac{dS}{dt} &= \gamma f(\epsilon) - \Lambda S \\ \Lambda(S) &= \frac{\Lambda_0}{1 + \frac{sS(t)}{k_{1/2}}} \end{cases} \quad (21)$$

436 where  $S$  is the number of sacB molecules,  $s$  is the  
 437 sucrose concentration,  $\gamma$  is the sacB production rate,  
 438 and the growth rate  $\Lambda$  is given by Monod kinetics with  
 439  $k_{1/2}$  is the half-velocity constant and maximum growth  
 440 rate  $\Lambda_0$ .

441 At steady-state, we get:

$$\begin{cases} S_0 &= \frac{\gamma f(\epsilon)}{\Lambda_0} \\ \Lambda(S_0) &= \frac{\Lambda_0}{1 + \frac{sS_0}{k_{1/2}}} \end{cases} \quad (22)$$

442 Solving for  $\Lambda$  in the quadratic equation generated,  
 443 we obtain

$$\lambda = \frac{\Lambda}{\Lambda_0} = 1 - \frac{s\gamma f(\epsilon)}{k_{1/2}\Lambda_0} \quad (23)$$

To find  $k_{1/2}$ , we measured the growth rate of cells that constitutively express *sacB* as a function of sucrose concentration and get that  $k_{1/2} = s_{1/2}S_{max}$ , where  $S_{max}$  is the maximum *sacB* level produced when  $f(\epsilon) = 1$ . From Fig. S2,  $s_{1/2} = 0.6\%$  sucrose and since the experiments were performed at a sucrose concentration of 4.5%, we can rearrange Eqn. 23 to get

$$\lambda = 1 - \alpha f(\epsilon) \quad (24)$$

where  $\alpha = \frac{0.045}{0.006} = 7.5$ .

The dCas12 occupancy  $\theta_c$  is related to the fold-change and growth rate  $\lambda = \frac{\Lambda}{\Lambda_0}$  according to

$$\theta_c = 1 - f(\epsilon) = 1 - \frac{1 - \lambda}{\alpha} = \nu \frac{\theta_{PAM}}{\Lambda} \quad (25)$$

Hence, given two arbitrary crRNA-target DNA configurations, the ratio of their dCas12 occupancies is

$$\frac{\theta'_c}{\theta_c} = \frac{\alpha - 1 + \lambda'}{\alpha - 1 + \lambda} = \frac{\lambda \nu' \theta'_{PAM}}{\lambda' \nu \theta_{PAM}} \quad (26)$$

Noting that  $\alpha \gg 1$ , we obtain

$$e^{-\beta\Delta\epsilon_{PAM}} \cdot e^{-\beta\Delta\epsilon^*} \approx \frac{\lambda'}{\lambda} \quad (27)$$

where  $\Delta\epsilon_{PAM}$  and  $\Delta\epsilon^*$  are the PAM and mismatch binding energy differences, respectively.

Eqn. 27 allows us to untangle the contribution of the thermodynamic determinants of Cas12 binding from growth-dependent effects due to *tetA-sacB* expression. As mentioned in the previous section, the thermodynamic determinants of Cas12 binding (parametrized as  $\epsilon_{PAM}$  and  $\Delta\epsilon^*$ ) can then be used to evaluate the relative cleavage activity and indel frequency between different DNA targets in any context (including for genomic edits in mammalian cells).

### Measuring dCas occupancy for TK selection.

When a crRNA regulates the expression of *tetA* or targets an essential gene, the growth rate  $\Lambda$  depends on the amount of *tetA* proteins  $T$  and tetracycline concentration  $[tet]$  in the cell. If we measure the growth rate of cells that constitutively express *tetA* as a function of tetracycline concentration (Fig. S2), we get that the half-max growth rate occurs for  $[tet]_{1/2} = 0.14 \mu\text{g/mL}$ . This means that the experiment were carried out at a  $10 \mu\text{g/mL}$  tetracycline concentration, any fold-change

$f(\epsilon)$  smaller than  $\frac{0.14 \mu\text{g/mL}}{10 \mu\text{g/mL}} = 0.014$  will prevent cells from growing. Therefore, even a partially-repressed *tetA-sacB* cassette will decrease the amount of *tetA* in the cell and can in turn drastically reduce the growth rate. We are therefore unable to detect differences in dCas12 binding by monitoring the growth rate alone, and we mainly use the TK growth rates as a means to confirm repression trends observed under SK selection.

## IV. MODEL PREDICTIONS

### Fitting the PAM attachment and mismatch costs.

According to Equation 20, two identical DNA targets that are flanked by different PAM sequence will have the same reconfiguration rate  $\nu$  but different PAM attachment energies, which in turn will yield different growth rates under SK conditions. In our model, the PAM attachment energy is defined as  $\epsilon_{PAM} = \sum_i \epsilon_b^i$ , where  $\epsilon_b^i$  is the specific binding energy of a base of type  $b=(T,C,G,A)$  at location  $i=(1..6)$ . In Fig. 3F and G, we use SK growth rates for PAM sites of the form NNNTTV to compute the position-dependent binding energies  $\epsilon_b^i$ .

First, we computed a *baseline* value for all  $e^{-\beta\epsilon_b^i}$ , the Boltzmann weight of base  $b=(T, C, G, A)$  at location  $i$ , by averaging all the growth rates of the PAM of the form NNNTTV. Specifically,

$$e^{-\beta\epsilon_b^i} = \begin{cases} e^{-\beta\epsilon_b^6} = \langle \lambda(bTTTTV) \rangle \\ e^{-\beta\epsilon_b^5} = \langle \lambda(TbTTTTV) \rangle \\ e^{-\beta\epsilon_b^4} = \langle \lambda(TTbTTTV) \rangle \\ e^{-\beta\epsilon_b^3} = 1 \text{ if } b=T, 0 \text{ otherwise} \\ e^{-\beta\epsilon_b^2} = 1 \text{ if } b=T, 0 \text{ otherwise} \\ e^{-\beta\epsilon_b^1} = \langle \lambda(NTTTTb) \rangle \end{cases} \quad (28)$$

where the brackets  $\langle \cdot \rangle$  signify averages over either  $V=(C, G, A)$  or  $N=(T, C, G, A)$ .

This process first yielded this unoptimized energy "matrix":

| TTV PAM site           | -6   | -5   | -4   | -3   | -2   | -1   |
|------------------------|------|------|------|------|------|------|
| $e^{-\beta\epsilon_T}$ | 0.91 | 0.91 | 0.91 | 1.00 | 1.00 | 0.14 |
| $e^{-\beta\epsilon_C}$ | 0.94 | 0.91 | 0.48 | 0.00 | 0.00 | 0.92 |
| $e^{-\beta\epsilon_G}$ | 0.92 | 0.87 | 0.38 | 0.00 | 0.00 | 0.92 |
| $e^{-\beta\epsilon_A}$ | 0.90 | 0.91 | 0.25 | 0.00 | 0.00 | 0.91 |

We then optimized the energy matrix for the TTV PAM sites by performing 1,000 optimization steps where we 1) added normally distributed noise  $\mathcal{N}(\mu = 0, \sigma^2 = 0.001)$  to each value of the energy matrix, 2) used the new matrix to compute new predicted values for  $\lambda(PAM)$  for the TTV PAM sites, 4) performed a



516 least-square fit of the predicted vs. measured growth  
517 rate values, and 5) updated the value of the energy  
518 matrix only if the least-square fit was smaller than in  
519 the previous iteration. The optimized matrix is shown  
520 in Fig. 3G.

521 A similar procedure was followed to extract an opti-  
522 mized energy matrix for the combined TTTV and  
523 TTTTV PAM data, obtaining

| (T)TTTV PAM site       | -6   | -5   | -4   | -3   | -2   | -1   |
|------------------------|------|------|------|------|------|------|
| $e^{-\beta\epsilon_T}$ | 0.96 | 1.00 | 1.03 | 1.00 | 1.00 | 0.23 |
| $e^{-\beta\epsilon_C}$ | 1.10 | 1.25 | 0.41 | 0.00 | 0.00 | 0.99 |
| $e^{-\beta\epsilon_G}$ | 0.96 | 0.98 | 0.64 | 0.00 | 0.00 | 0.99 |
| $e^{-\beta\epsilon_A}$ | 0.97 | 0.98 | 0.29 | 0.00 | 0.00 | 0.99 |

525 The predicted values for the TTV PAM sites were  
526 computed from the energy matrix shown in Fig. 3G  
527 and those of the form (T)TTTV were computed from  
528 the (T)TTTV PAM site matrix above. The combined  
529 model has a predicted-measured Pearson correlation  
530 of 0.943.

531 We performed the same procedure to generate the  
532 mismatch energy matrix in Fig. 4E. In this case, we  
533 first computed the baseline position-dependent en-  
534 ergy costs  $e^{-\beta\Delta\epsilon_i}$  from the values of the growth rate  
535 for individual mutations (Fig. 4C). This unoptimized  
536 energy matrix is given by

|                                |      |      |      |      |      |      |      |      |      |      |
|--------------------------------|------|------|------|------|------|------|------|------|------|------|
| Position                       | 1    | 2    | 3    | 4    | 5    | 6    | 7    | 8    | 9    | 10   |
| $e^{-\beta\Delta\epsilon_i^*}$ | 0.39 | 0.41 | 0.28 | 0.26 | 0.78 | 41   | 0.25 | 0.61 | 0.52 | 0.25 |
| Position                       | 11   | 12   | 13   | 14   | 15   | 16   | 17   | 18   | 19   | 20   |
| $e^{-\beta\Delta\epsilon_i^*}$ | 0.36 | 0.24 | 0.17 | 0.18 | 0.23 | 0.65 | 0.75 | 0.83 | 1.05 | 1.07 |

539 We used this initial set of values for  $e^{-\beta\Delta\epsilon_i^*}$  to evalu-  
540 ate the accuracy of the model prediction in computing  
541 the growth rate for crRNA that contain two mismatches  
542 from  $\lambda(2MM) = e^{-\beta\sum_i \epsilon_i^*}$ . In this case, the Pear-  
543 son correlation between the predicted and measured  
544 growth rate values is 0.769. By subjecting the position-  
545 dependent energy matrix to the fitting/optimization  
546 procedure described above for 10,000 steps, we ob-  
547 tained the set of values for  $e^{-\beta\Delta\epsilon_i^*}$  shown in Fig. 4F,  
548 which yield a Pearson correlation of 0.869.

## 549 V. SUPPLEMENTARY REFERENCES

- 550 [1] Zaslaver, A. *et al.* A comprehensive library of fluores-  
551 cent transcriptional reporters for Escherichia coli. *Nature*  
552 *methods* **3**, 623–628 (2006).
- 553 [2] Shalem, O. *et al.* Genome-Scale CRISPR-Cas9  
554 Knockout Screening in Human Cells. *Science* **343**, 84–87  
555 (2014).
- 556 [3] Li, X.-t., Thomason, L. C., Sawitzke, J. A., Costantino,  
557 N. & Court, D. L. Positive and negative selection using  
558 the tetA-sacB cassette: recombineering and P1 transduc-  
559 tion in Escherichia coli. *Nucleic Acids Research* **41**, e204  
560 (2013).

561 [4] Law, C. W., Chen, Y., Shi, W. & Smyth, G. K. voom:  
562 precision weights unlock linear model analysis tools for  
563 RNA-seq read counts. *Genome Biology* **15**, R29 (2014).

564 [5] Cleveland, W. S. Robust Locally Weighted Regres-  
565 sion and Smoothing Scatterplots. *Journal of the Ameri-  
566 can Statistical Association* **74**, 829–836 (1979).

567 [6] Cappellari, M. *et al.* The ATLAS3d project ? XX.  
568 Mass-size and mass $\sigma$  distributions of early-type galax-  
569 ies: bulge fraction drives kinematics, mass-to-light ratio,  
570 molecular gas fraction and stellar initial mass function.  
571 *Monthly Notices of the Royal Astronomical Society* **432**,  
572 1862–1893 (2013).

573 [7] Weinert, F. M., Brewster, R. C., Rydenfelt, M., Phillips,  
574 R. & Kegel, W. K. Scaling of Gene Expression with  
575 Transcription-Factor Fugacity. *Physical Review Letters*  
576 **113**, 258101 (2014).

577 [8] Brewster, R. *et al.* The Transcription Factor Titr-  
578 ation Effect Dictates Level of Gene Expression. *Cell* **156**,  
579 1312–1323 (2014).

580 [9] Jeon, Y. *et al.* Direct observation of DNA target search-  
581 ing and cleavage by CRISPR-Cas12a. *Nature Communi-  
582 cations* **9**, 2777 (2018).

583 [10] Jones, D. L. *et al.* Kinetics of dCas9 target search in  
584 Escherichia coli. *Science* **357**, 1420–1424 (2017).

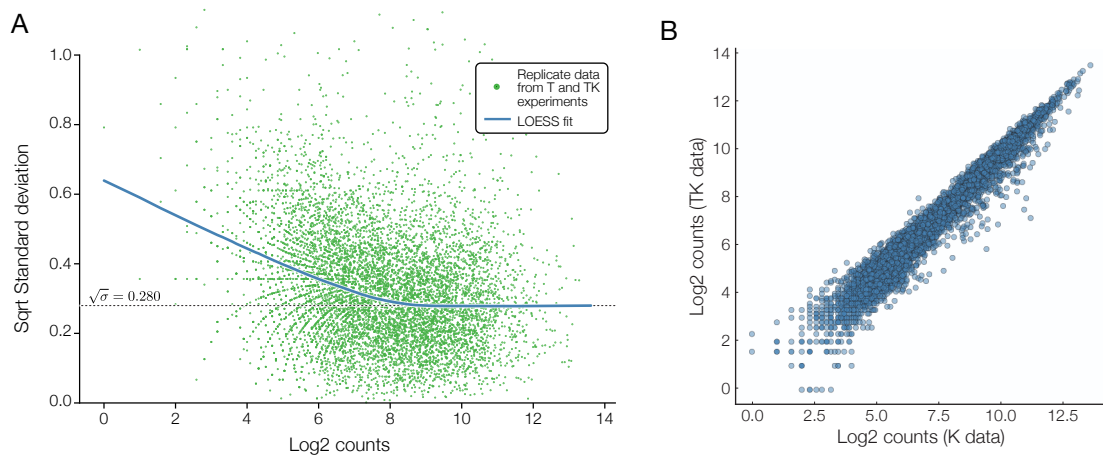

FIG. S1. Error calculations. A) Error bars are calculated using a LOESS fit [5] of the mean/variance relationship between experimental replicates of the fold change, inspired by the error estimation in [4]. In this figure, the standard deviation is computed from independent replicates sourced from the K and TK selection conditions with 6 mismatches in the seed sequence. B) Comparing the raw counts from the K and TK independent replicates.

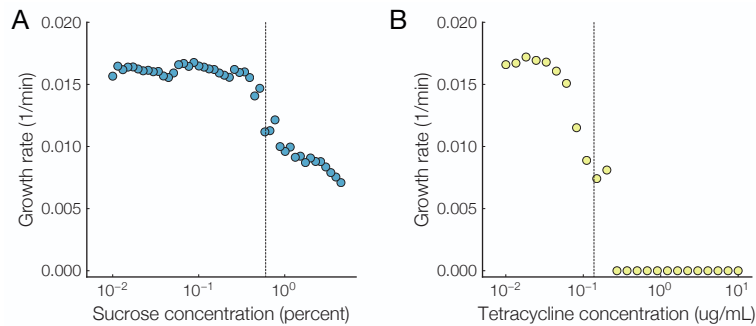

FIG. S2. Growth rate under sucrose and tetracycline. A) Sucrose-dependent growth rate for cells that fully express the tetA-sacB cassette. Transition between growth/no-growth occurs at 0.6%. B) Tetracycline-dependent growth rate for cells that fully express the tetA-sacB cassette. Transition between no-growth/growth occurs at 0.14  $\mu\text{g/mL}$ .

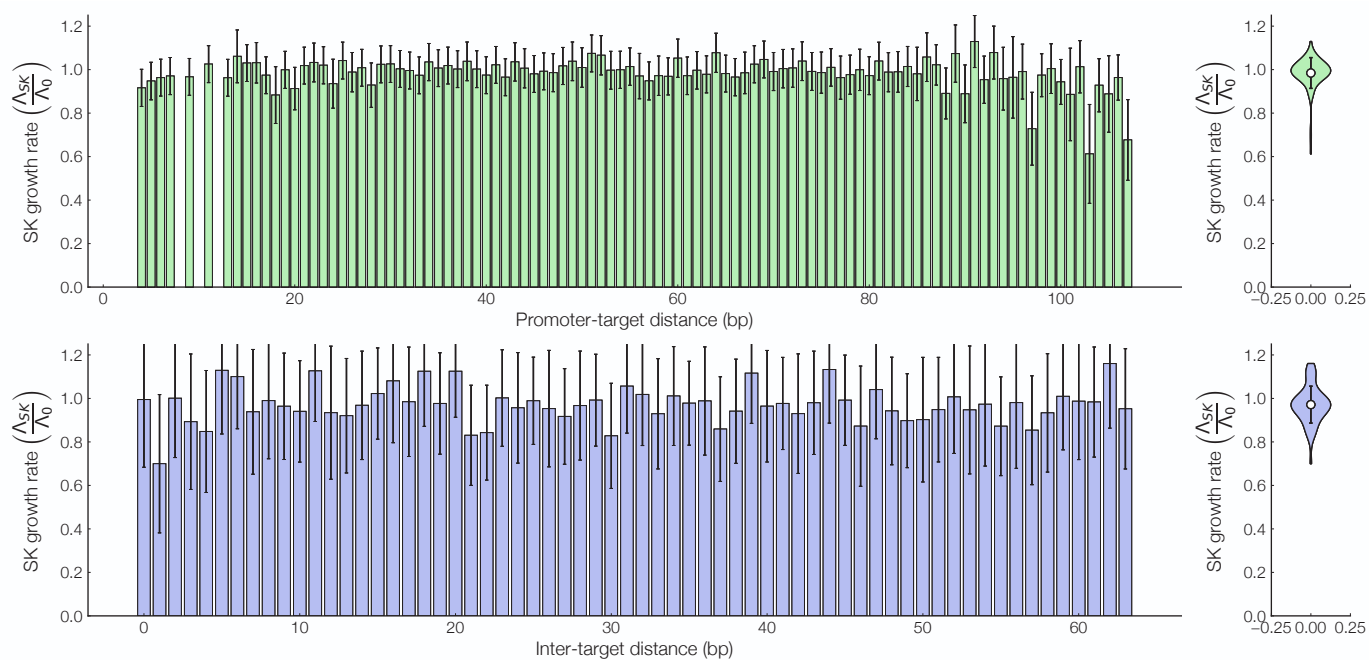

FIG. S3. Promoter-target and intra-target distances. Growth rate in SK conditions for inverter constructs which contain (A) a single target or (B) two targets located after the +1 location of the output promoter. Violin plots of the distribution of all constructs is shown on the left. Error bars = std. dev.

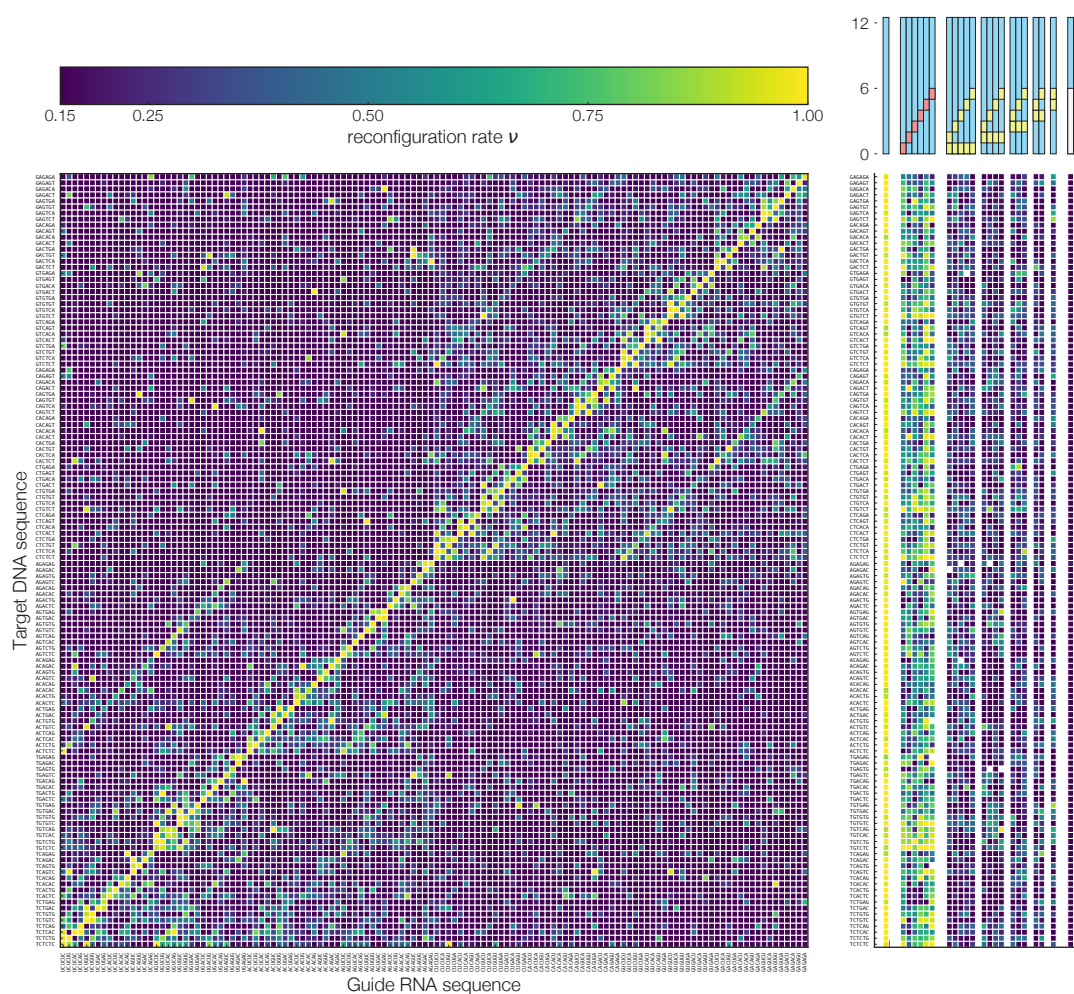

FIG. S4. Cross-talk map target DNA dependent mismatch map of the growth rate under 4.5% sucrose (SK) conditions for (SWSWSW+WSWSWS) $\times$ (SWSWSW+WSWSWS) seed constructs.



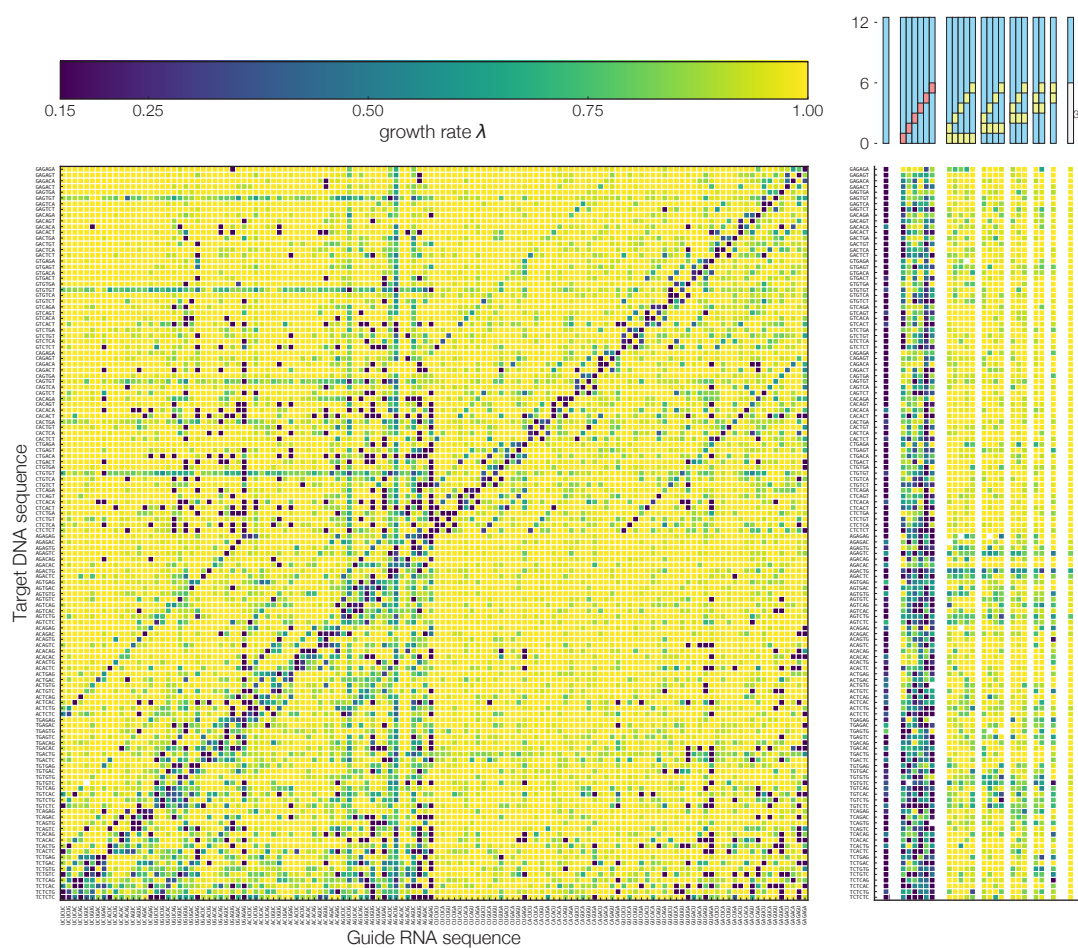

FIG. S5. Cross-talk map target DNA dependent mismatch map of the growth rate under  $10\mu\text{g/mL}$  tetracycline (TK) conditions for  $(\text{SWSWSW}+\text{WSWSWS})_x(\text{SWSWSW}+\text{WSWSWS})$  seed constructs.

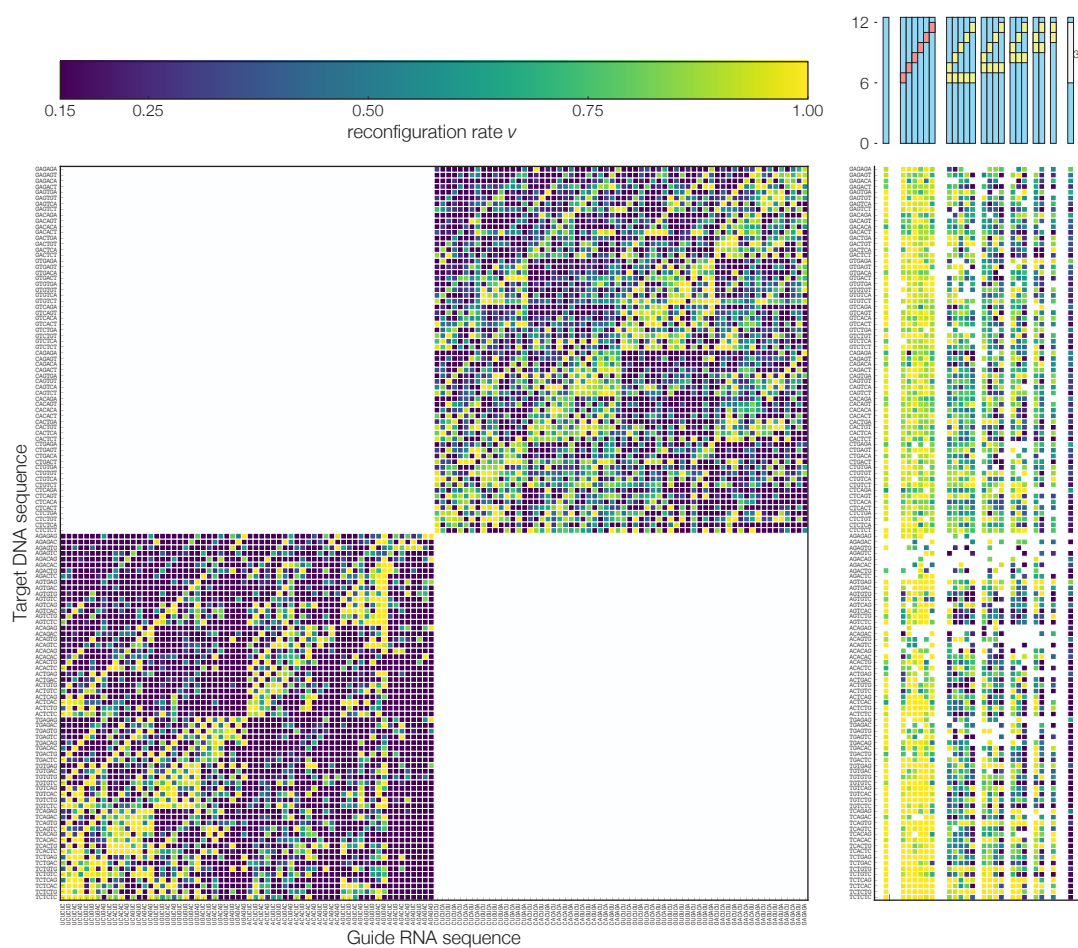

FIG. S6. Cross-talk map target DNA dependent mismatch map of the growth rate under 4.5% sucrose (SK) conditions for  $(SWSWSW)_x(SWSWSW) + (WSWSWS)_x(WSWSWS)$  trunk constructs.

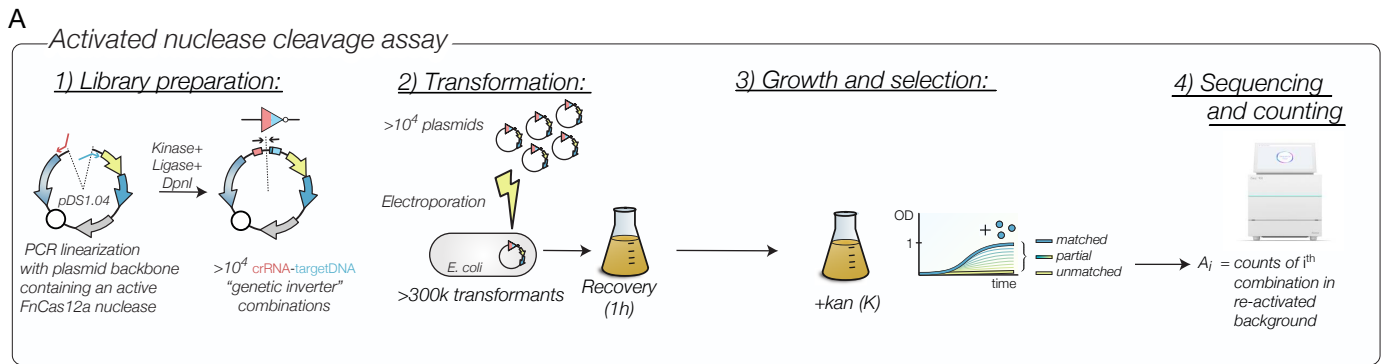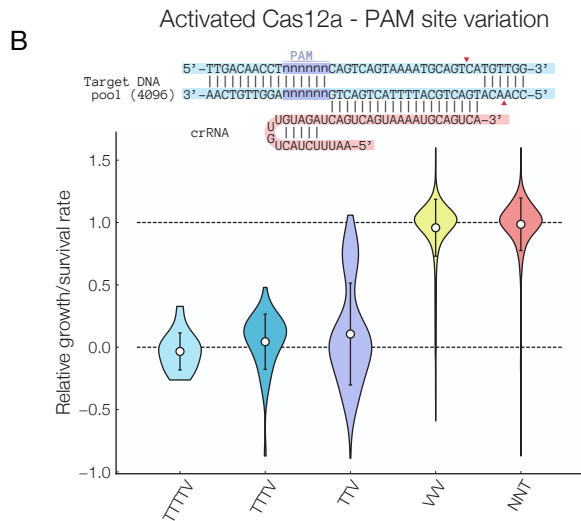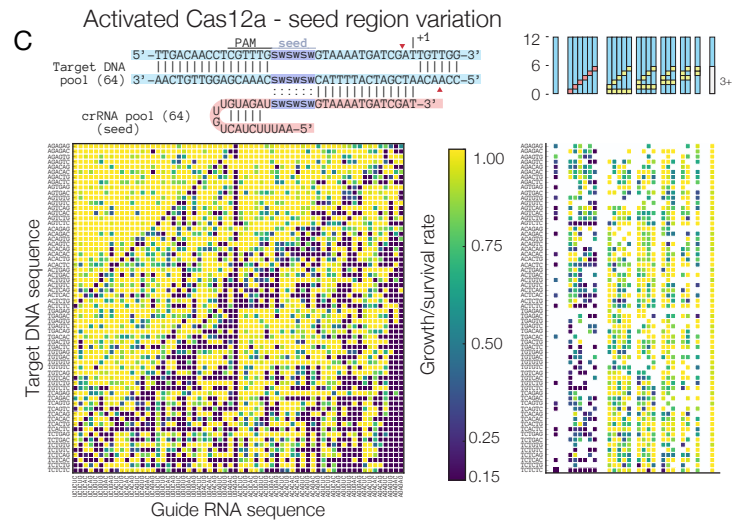

FIG. S7. A) Experimental workflow for experiment with activated FnCas12a nuclease sites. B) Relative growth/survival rates for activate FnCas12a nuclease that targets a DNA sequence with a 5'-NNNNNN-3' PAM site located at the promoter's -19 position. C) Cross-talk map target DNA dependent mismatch map of the relative density of (SWSWSW+WSWSWS) seed constructs for FnCas12a with re-activated nuclease sites.
